# Supplementary material for: Protist-Type Lysozymes of the Nematode Caenorhabditis elegans Contribute to Resistance against Pathogenic Bacillus thuringiensis
Source: PLoS One. 2011 Sep 8;6(9):e24619. doi: 10.1371/journal.pone.0024619 (PMC3169628; doi:10.1371/journal.pone.0024619)
Supplement: Table S2 — Summary of the significantly differentially regulated genes upon pathogen exposure of C. elegans . (XLS) [file pone.0024619.s002.xls]

## Sheet: Summary
Summary list of significantly differentially expressed genes in the three tested C.elegans strains
GENE WB ID	Gene public name	EuGene	MY15-DOWN	MY15-UP	MY18-DOWN	MY18-UP	N2-DOWN	N2-UP
WBGene00019801	aak-1	PAR2.3		1		1		1
WBGene00018339	abcf-3	F42A10.1		1
WBGene00000016	abf-5	T22H6.5	1
WBGene00000017	abf-6	T22H6.7	1
WBGene00000018	abl-1	M79.1		1				1
WBGene00019844	abts-4	R03E9.3		1
WBGene00016943	acdh-1	C55B7.4	1		1		1
WBGene00015894	acdh-2	C17C3.12	1		1		1
WBGene00000050	acr-11	D2092.3				1		1
WBGene00014998	AH9.1	AH9.1					1
WBGene00000095	aha-1	C25A1.11	1
WBGene00000107	alh-1	F54D8.3	1		1
WBGene00007010	alx-1	R10E12.1	1
WBGene00020140	ant-1.44	T01B11.4	1
WBGene00000144	apc-10	F15H10.3	1
WBGene00000148	aph-2	ZC434.6	1
WBGene00010769	asah-1	K11D2.2			1
WBGene00011279	asd-1	R74.5		1
WBGene00000210	asg-2	C53B7.4			1
WBGene00018577	asna-2	F47G3.2				1
WBGene00000214	asp-1	Y39B6A.20			1
WBGene00000215	asp-2	T18H9.2			1
WBGene00000216	asp-3	H22K11.1	1		1
WBGene00000218	asp-5	F21F8.3			1
WBGene00000219	asp-6	F21F8.7	1
WBGene00021922	atg-3	Y55F3AM.4		1
WBGene00007097	B0024.4	B0024.4		1		1		1
WBGene00007112	B0035.13	B0035.13			1
WBGene00015006	B0041.1	B0041.1	1
WBGene00015011	B0041.8	B0041.8	1
WBGene00015037	B0212.3	B0212.3					1
WBGene00015038	B0212.4	B0212.4	1
WBGene00015091	B0261.1	B0261.1		1
WBGene00015152	B0348.2	B0348.2		1		1
WBGene00007181	B0462.1	B0462.1	1
WBGene00007188	B0464.9	B0464.9	1
WBGene00015227	B0507.10	B0507.10	1
WBGene00015258	B0554.5	B0554.5			1
WBGene00017452	bath-29	F14D2.4	1
WBGene00019140	bath-3	F59H6.10		1
WBGene00000252	bli-2	F59E12.12	1		1
WBGene00000254	bli-4	K04F10.4		1		1		1
WBGene00017757	bra-2	F23H11.1	1		1
WBGene00019700	btb-11	M01D1.3	1
WBGene00015292	C01C4.2	C01C4.2	1				1
WBGene00007224	C01G6.2	C01G6.2	1
WBGene00015330	C02B10.5	C02B10.5						1
WBGene00007261	C02C6.3	C02C6.3		1
WBGene00015339	C02E7.6	C02E7.6	1		1
WBGene00015340	C02E7.7	C02E7.7	1		1
WBGene00015358	C02F12.9	C02F12.9					1
WBGene00007296	C04C11.2	C04C11.2		1
WBGene00015455	C04G6.5	C04G6.5		1
WBGene00007331	C05C10.4	C05C10.4	1		1
WBGene00007338	C05C12.6	C05C12.6		1		1		1
WBGene00015477	C05D10.1	C05D10.1	1
WBGene00015502	C06A5.4	C06A5.4	1		1
WBGene00007409	C07B5.4	C07B5.4	1
WBGene00007415	C07E3.4	C07E3.4	1
WBGene00015586	C08A9.6	C08A9.6						1
WBGene00007481	C09F9.4	C09F9.4	1
WBGene00015650	C09G4.2	C09G4.2				1
WBGene00007503	C09H10.9	C09H10.9						1
WBGene00015671	C10B5.3	C10B5.3	1
WBGene00015696	C10H11.7	C10H11.7					1
WBGene00007585	C14C10.2	C14C10.2		1
WBGene00007601	C15C6.2	C15C6.2	1
WBGene00015823	C16B8.3	C16B8.3		1
WBGene00015851	C16C8.13	C16C8.13						1
WBGene00015879	C17B7.5	C17B7.5	1
WBGene00007637	C17D12.1	C17D12.1	1				1
WBGene00007645	C17E4.6	C17E4.6		1
WBGene00015899	C17E7.4	C17E7.4					1
WBGene00015913	C17F4.7	C17F4.7			1
WBGene00015938	C17H12.13	C17H12.13		1				1
WBGene00015932	C17H12.6	C17H12.6		1		1		1
WBGene00015933	C17H12.8	C17H12.8		1		1		1
WBGene00015952	C18B2.1	C18B2.1	1
WBGene00015972	C18E3.3	C18E3.3		1
WBGene00015974	C18E3.5	C18E3.5		1
WBGene00007689	C18E9.9	C18E9.9	1
WBGene00015988	C18H2.1	C18H2.1	1
WBGene00016011	C23G10.2	C23G10.2		1
WBGene00016087	C25A11.2	C25A11.2	1
WBGene00016082	C25A8.1	C25A8.1	1		1
WBGene00016085	C25A8.5	C25A8.5				1
WBGene00007715	C25D7.2	C25D7.2		1				1
WBGene00007736	C25G4.10	C25G4.10	1
WBGene00016117	C25H3.8	C25H3.8				1
WBGene00016154	C27A12.2	C27A12.2				1
WBGene00016193	C28H8.2	C28H8.2			1
WBGene00016198	C28H8.7	C28H8.7	1		1		1
WBGene00007812	C29F7.3	C29F7.3			1
WBGene00016251	C30E1.2	C30E1.2						1
WBGene00016261	C30F12.2	C30F12.2		1
WBGene00007861	C32A9.1	C32A9.1				1
WBGene00007869	C32H11.6	C32H11.6	1
WBGene00007894	C33D3.3	C33D3.3				1
WBGene00016351	C33F10.1	C33F10.1			1
WBGene00016358	C33F10.12	C33F10.12					1
WBGene00016353	C33F10.4	C33F10.4						1
WBGene00016362	C33G8.4	C33G8.4			1
WBGene00007920	C34C12.1	C34C12.1	1
WBGene00007944	C34F6.10	C34F6.10		1
WBGene00016420	C34G6.3	C34G6.3	1
WBGene00007947	C35A5.3	C35A5.3	1
WBGene00016434	C35B1.4	C35B1.4	1
WBGene00007955	C35C5.3	C35C5.3		1
WBGene00016447	C35D10.11	C35D10.11	1		1
WBGene00016454	C35E7.2	C35E7.2						1
WBGene00007969	C36A4.9	C36A4.9			1
WBGene00016481	C36C5.12	C36C5.12			1
WBGene00016489	C36E6.1	C36E6.1						1
WBGene00016496	C37C3.2	C37C3.2				1
WBGene00008034	C39E9.11	C39E9.11			1
WBGene00008038	C40H1.2	C40H1.2	1
WBGene00008061	C41G7.3	C41G7.3			1
WBGene00016590	C42C1.12	C42C1.12	1
WBGene00016594	C42D4.1	C42D4.1		1
WBGene00016620	C43H6.7	C43H6.7		1				1
WBGene00008100	C44H9.5	C44H9.5		1				1
WBGene00016694	C45H4.13	C45H4.13						1
WBGene00016695	C45H4.14	C45H4.14	1
WBGene00016704	C46C11.1	C46C11.1		1
WBGene00016714	C46F2.1	C46F2.1		1				1
WBGene00016721	C46G7.1	C46G7.1		1
WBGene00008166	C47G2.5	C47G2.5		1
WBGene00008170	C48B4.7	C48B4.7					1
WBGene00008199	C49C3.9	C49C3.9		1		1		1
WBGene00008207	C49F5.3	C49F5.3						1
WBGene00008210	C49F5.6	C49F5.6	1				1
WBGene00008219	C50B6.3	C50B6.3					1
WBGene00016845	C50F7.5	C50F7.5		1
WBGene00016887	C52E2.8	C52E2.8	1		1		1
WBGene00016894	C53B7.3	C53B7.3		1
WBGene00016923	C54F6.5	C54F6.5						1
WBGene00016971	C56E6.3	C56E6.3						1
WBGene00000284	cah-6	T28F2.3				1		1
WBGene00010351	cbd-1	H02I12.1	1		1
WBGene00013319	ccch-5	Y57G11C.25			1
WBGene00014204	ccdc-47	ZK1058.4	1
WBGene00000376	ccr-4	ZC518.3	1
WBGene00000380	cct-5	C07G2.3						1
WBGene00000383	cdc-14	C17G10.4			1
WBGene00000397	cdh-5	F08B4.2		1
WBGene00000409	cdk-8	F39H11.3				1
WBGene00010472	cdr-7	K01D12.13		1
WBGene00000464	ceh-44	Y54F10AM.4		1
WBGene00022837	ceh-45	ZK993.1	1
WBGene00000473	cey-2	F46F11.2			1
WBGene00000475	cey-4	Y39A1C.3	1
WBGene00000477	cft-1	C18C4.2	1		1
WBGene00000478	cfz-2	F27E11.3		1
WBGene00020712	ckr-1	T23B3.4				1		1
WBGene00000521	cky-1	C15C8.2				1		1
WBGene00000522	clc-1	C09F12.1						1
WBGene00000527	cle-1	C36B1.1	1
WBGene00021032	clec-118	W04H10.4	1
WBGene00015821	clec-135	C16A11.8	1
WBGene00012086	clec-144	T27D12.3	1
WBGene00014138	clec-186	ZK896.7		1
WBGene00008202	clec-197	C49C3.12	1
WBGene00019738	clec-265	M02F4.7		1		1		1
WBGene00012022	clec-39	T25E12.7	1
WBGene00012583	clec-4	Y38E10A.5		1		1		1
WBGene00017199	clec-45	F07C4.2		1
WBGene00011668	clec-47	T09F5.9		1
WBGene00015052	clec-52	B0218.8	1
WBGene00009394	clec-63	F35C5.6		1	1
WBGene00018547	clec-78	F47C12.2	1
WBGene00021879	clec-83	Y54G2A.14		1		1		1
WBGene00021895	clec-84	Y54G2A.33	1
WBGene00013125	clec-92	Y52B11A.5	1
WBGene00000550	clu-1	F55H2.6		1
WBGene00000566	cnt-2	Y39A1A.15		1
WBGene00000678	col-104	F58F6.1	1
WBGene00000679	col-105	F58F6.2			1		1
WBGene00000681	col-107	C34H4.4	1
WBGene00000682	col-108	Y41D4A.2	1
WBGene00000686	col-112	Y73B6BL.34	1		1
WBGene00000601	col-12	F15H10.1			1
WBGene00000602	col-13	F15H10.2	1
WBGene00000705	col-131	C39E9.3	1
WBGene00000706	col-132	C39E9.9	1
WBGene00000725	col-152	F32G8.5	1
WBGene00000728	col-155	F55C10.3			1
WBGene00000730	col-157	T11F9.9			1
WBGene00000732	col-159	F57B1.3				1		1
WBGene00000738	col-165	F14H12.1				1
WBGene00000606	col-17	F11G11.10	1		1
WBGene00000745	col-172	F38B6.5	1		1
WBGene00000748	col-175	C35B8.1	1
WBGene00000755	col-182	R09A8.4	1
WBGene00000626	col-49	K09H9.3	1
WBGene00000634	col-58	F26B1.4	1
WBGene00000636	col-60	F22D6.10	1		1
WBGene00000639	col-63	ZK265.2	1		1
WBGene00000647	col-71	Y49F6B.10	1
WBGene00000648	col-72	W09G10.1	1
WBGene00000649	col-73	F11G11.12	1
WBGene00000650	col-74	ZK1248.2	1
WBGene00000653	col-77	M195.1	1
WBGene00000654	col-78	W07A12.5	1
WBGene00000661	col-86	Y81G3A.5	1
WBGene00000665	col-90	C29E4.1			1
WBGene00000667	col-92	W05B2.6				1
WBGene00000668	col-93	W05B2.5				1
WBGene00000672	col-97	ZK1010.7			1
WBGene00000768	cor-1	R01H10.3	1
WBGene00015677	cpg-4	C10F3.1	1
WBGene00022072	cpg-9	Y67D8C.8			1
WBGene00000776	cpl-1	T03E6.7	1
WBGene00000781	cpr-1	C52E4.1	1		1		1
WBGene00000782	cpr-2	F36D3.9	1		1
WBGene00000783	cpr-3	T10H4.12		1		1		1
WBGene00000784	cpr-4	F44C4.3	1
WBGene00000785	cpr-5	W07B8.5	1		1		1
WBGene00000786	cpr-6	C25B8.3	1		1
WBGene00000787	cps-6	C41D11.8						1
WBGene00000788	cpz-1	F32B5.8			1
WBGene00013709	csnk-1	Y106G6E.6		1		1
WBGene00017641	csr-1	F20D12.1					1
WBGene00006424	ctbp-1	F49E10.5		1
WBGene00007068	cTel55X.1	cTel55X.1	1
WBGene00013220	ctl-3	Y54G11A.13	1		1		1
WBGene00009041	cut-3	F22B5.3				1		1
WBGene00020663	cutl-22	T21H3.4	1
WBGene00000881	cyn-5	F31C3.1			1
WBGene00011677	cyp-13A1	T10B9.8				1
WBGene00007967	cyp-25A4	C36A4.6	1
WBGene00018326	cyp-25A5	F42A6.4	1
WBGene00016686	cyp-33C1	C45H4.2				1
WBGene00015043	cyp-34A8	B0213.14	1
WBGene00016997	D1005.3	D1005.3	1
WBGene00017021	D1022.2	D1022.2			1
WBGene00017028	D1044.2	D1044.2	1
WBGene00008376	D1054.9	D1054.9	1			1
WBGene00008393	D1086.6	D1086.6	1		1
WBGene00017041	D2007.1	D2007.1		1
WBGene00017077	D2096.10	D2096.10	1
WBGene00017071	D2096.3	D2096.3	1		1
WBGene00000895	dac-1	B0412.1	1
WBGene00010266	dct-18	F58G1.4			1
WBGene00021006	dct-9	W03F11.3	1		1
WBGene00011580	ddx-19	T07D4.4	1
WBGene00009717	dep-1	F44G4.8		1
WBGene00000998	dig-1	K07E12.1		1
WBGene00001006	dlg-1	C25F6.2		1
WBGene00001007	dli-1	C39E9.14	1
WBGene00001032	dnj-14	K02G10.8		1
WBGene00001023	dnj-5	C04A2.7	1
WBGene00022644	dod-19	ZK6.10				1		1
WBGene00010125	dod-22	F55G11.5		1
WBGene00001059	dpf-6	F44B9.1						1
WBGene00001072	dpy-10	T14B4.7	1
WBGene00001074	dpy-13	F30B5.1	1		1
WBGene00001075	dpy-14	H27M09.4	1
WBGene00001067	dpy-5	F27C1.8		1	1
WBGene00016103	dpyd-1	C25F6.3			1		1
WBGene00008448	E01G4.6	E01G4.6	1		1
WBGene00017098	E02D9.1	E02D9.1						1
WBGene00001155	ech-6	T05G5.6	1		1		1
WBGene00017143	EEED8.15	EEED8.15		1		1		1
WBGene00001190	egl-23	Y37A1B.11	1
WBGene00009098	ehbp-1	F25B3.1			1
WBGene00001225	eif-3.B	Y54E2A.11		1
WBGene00001244	elo-6	F41H10.8	1		1
WBGene00001336	ers-1	Y41E3.4	1
WBGene00001337	ers-2	ZC434.5		1				1
WBGene00001338	ers-3	T07A9.2	1
WBGene00001340	etr-1	T01D1.2				1
WBGene00001368	exc-7	F35H8.5				1
WBGene00008497	F01D5.7	F01D5.7				1
WBGene00017172	F02C9.1	F02C9.1	1
WBGene00008557	F07H5.6	F07H5.6				1
WBGene00008566	F08A8.3	F08A8.3	1
WBGene00008567	F08A8.4	F08A8.4	1
WBGene00017237	F08B4.5	F08B4.5						1
WBGene00017274	F08F8.9	F08F8.9	1
WBGene00008592	F08H9.4	F08H9.4				1
WBGene00008601	F09A5.4	F09A5.4	1
WBGene00008607	F09B12.3	F09B12.3	1		1		1
WBGene00008621	F09C8.1	F09C8.1	1
WBGene00008624	F09E8.2	F09E8.2				1
WBGene00017319	F09G8.3	F09G8.3	1		1		1
WBGene00008650	F10D11.4	F10D11.4	1
WBGene00008652	F10D11.6	F10D11.6	1
WBGene00017340	F10D7.3	F10D7.3	1		1
WBGene00017342	F10D7.5	F10D7.5						1
WBGene00017380	F11D5.1	F11D5.1		1
WBGene00017383	F11D5.6	F11D5.6	1		1
WBGene00008721	F12F6.2	F12F6.2				1
WBGene00008726	F13A7.11	F13A7.11		1
WBGene00008741	F13D12.6	F13D12.6			1
WBGene00008777	F13H10.6	F13H10.6		1
WBGene00017431	F13H6.3	F13H6.3			1
WBGene00017446	F14B8.4	F14B8.4	1
WBGene00017451	F14D2.2	F14D2.2				1
WBGene00008816	F14F8.8	F14F8.8		1		1		1
WBGene00017490	F15E11.1	F15E11.1	1		1		1
WBGene00017498	F15E11.12	F15E11.12			1
WBGene00017500	F15E11.14	F15E11.14	1		1		1
WBGene00017506	F16B4.4	F16B4.4	1
WBGene00008922	F17C11.11	F17C11.11		1
WBGene00008920	F17C11.9	F17C11.9					1
WBGene00008933	F18A11.6	F18A11.6		1
WBGene00017552	F18A12.3	F18A12.3			1
WBGene00017569	F18E9.3	F18E9.3		1
WBGene00017572	F18E9.6	F18E9.6	1		1
WBGene00017582	F18G5.6	F18G5.6		1
WBGene00017588	F19B10.6	F19B10.6	1
WBGene00008944	F19B2.5	F19B2.5		1
WBGene00017609	F19G12.1	F19G12.1	1
WBGene00017611	F19G12.3	F19G12.3					1
WBGene00008959	F19H6.4	F19H6.4						1
WBGene00017621	F20A1.10	F20A1.10	1		1
WBGene00008983	F20E11.5	F20E11.5	1
WBGene00017649	F20H11.6	F20H11.6	1
WBGene00017659	F21C10.10	F21C10.10			1
WBGene00017660	F21C10.11	F21C10.11		1
WBGene00017678	F21F8.4	F21F8.4	1				1
WBGene00009046	F22B8.3	F22B8.3					1
WBGene00017699	F22D3.2	F22D3.2		1
WBGene00009062	F22G12.2	F22G12.2					1
WBGene00017726	F22H10.2	F22H10.2				1
WBGene00017727	F22H10.3	F22H10.3		1		1		1
WBGene00017734	F23C8.5	F23C8.5			1
WBGene00017766	F25B4.2	F25B4.2	1
WBGene00017771	F25B4.8	F25B4.8	1		1
WBGene00017798	F25G6.7	F25G6.7		1
WBGene00017803	F26A1.4	F26A1.4	1
WBGene00017821	F26D11.4	F26D11.4	1
WBGene00017881	F28A12.4	F28A12.4			1
WBGene00017894	F28B12.1	F28B12.1	1
WBGene00017886	F28B3.5	F28B3.5		1
WBGene00017908	F28H1.1	F28H1.1		1
WBGene00009237	F28H7.3	F28H7.3	1		1
WBGene00017936	F30B5.7	F30B5.7		1		1
WBGene00009279	F31B9.2	F31B9.2	1
WBGene00017969	F32A5.3	F32A5.3			1
WBGene00009306	F32A7.5	F32A7.5		1
WBGene00017982	F32D1.2	F32D1.2			1
WBGene00009355	F33A8.7	F33A8.7		1
WBGene00009433	F35E12.9	F35E12.9		1
WBGene00009412	F35E2.5	F35E2.5	1
WBGene00018136	F37A4.6	F37A4.6						1
WBGene00018149	F37C12.1	F37C12.1		1
WBGene00018145	F37C4.5	F37C4.5		1
WBGene00018173	F38B6.3	F38B6.3						1
WBGene00018234	F40E12.1	F40E12.1	1
WBGene00018232	F40E3.5	F40E3.5	1
WBGene00009587	F40F11.2	F40F11.2	1		1
WBGene00009579	F40F8.8	F40F8.8				1
WBGene00018252	F40H3.6	F40H3.6		1		1
WBGene00018254	F40H6.2	F40H6.2	1
WBGene00018259	F41B4.3	F41B4.3					1
WBGene00018267	F41C3.1	F41C3.1		1
WBGene00018271	F41C3.5	F41C3.5			1
WBGene00009613	F41D3.8	F41D3.8	1
WBGene00018297	F41F3.3	F41F3.3	1		1
WBGene00018310	F41G4.7	F41G4.7	1		1		1
WBGene00009627	F42A8.3	F42A8.3		1
WBGene00018335	F42A9.6	F42A9.6	1
WBGene00018336	F42A9.7	F42A9.7						1
WBGene00009643	F42G4.6	F42G4.6	1
WBGene00018359	F42G8.8	F42G8.8		1
WBGene00018375	F43C9.1	F43C9.1			1
WBGene00018390	F43E2.1	F43E2.1				1
WBGene00009659	F43G6.7	F43G6.7	1
WBGene00009667	F43G9.4	F43G9.4				1
WBGene00018403	F44A2.3	F44A2.3		1		1
WBGene00009687	F44D12.10	F44D12.10		1
WBGene00009681	F44D12.4	F44D12.4	1
WBGene00018420	F44E2.7	F44E2.7	1
WBGene00009775	F46B6.10	F46B6.10	1
WBGene00009773	F46B6.8	F46B6.8	1		1
WBGene00018487	F46C8.8	F46C8.8	1
WBGene00018489	F46E10.2	F46E10.2	1
WBGene00018522	F46H5.7	F46H5.7		1
WBGene00009801	F47A4.5	F47A4.5				1
WBGene00009812	F47B10.1	F47B10.1	1
WBGene00018574	F47F6.4	F47F6.4	1
WBGene00018598	F48C1.5	F48C1.5				1
WBGene00018602	F48D6.4	F48D6.4			1
WBGene00009845	F48F5.1	F48F5.1						1
WBGene00009899	F49E12.6	F49E12.6						1
WBGene00009888	F49E2.5	F49E2.5				1
WBGene00009907	F49H6.3	F49H6.3		1		1
WBGene00018706	F52F10.2	F52F10.2			1
WBGene00009944	F52H3.2	F52H3.2	1
WBGene00018724	F53A9.1	F53A9.1		1		1		1
WBGene00018725	F53A9.2	F53A9.2		1		1		1
WBGene00018729	F53A9.6	F53A9.6		1		1
WBGene00018730	F53A9.7	F53A9.7		1
WBGene00018732	F53A9.9	F53A9.9	1		1		1
WBGene00009966	F53B7.3	F53B7.3	1
WBGene00009973	F53C11.3	F53C11.3	1
WBGene00009982	F53F1.4	F53F1.4	1		1
WBGene00009983	F53F1.5	F53F1.5			1
WBGene00018770	F53G2.8	F53G2.8		1
WBGene00018805	F54D10.4	F54D10.4				1		1
WBGene00010049	F54D5.3	F54D5.3	1		1
WBGene00010050	F54D5.4	F54D5.4		1
WBGene00010052	F54D5.7	F54D5.7	1		1		1
WBGene00023067	F54D7.6	F54D7.6		1
WBGene00010062	F54F3.3	F54F3.3	1
WBGene00018846	F54H12.6	F54H12.6				1
WBGene00010086	F55B11.4	F55B11.4		1
WBGene00018868	F55C7.2	F55C7.2				1
WBGene00010107	F55C9.11	F55C9.11	1		1		1
WBGene00010103	F55C9.6	F55C9.6				1		1
WBGene00018896	F55F8.8	F55F8.8	1
WBGene00018902	F55G1.6	F55G1.6	1		1
WBGene00010127	F55G11.7	F55G11.7		1
WBGene00010139	F56A8.3	F56A8.3		1
WBGene00018932	F56B3.8	F56B3.8	1
WBGene00018954	F56C9.11	F56C9.11		1	1
WBGene00018969	F56D3.1	F56D3.1			1
WBGene00010164	F56H6.3	F56H6.3		1
WBGene00010177	F57A8.1	F57A8.1		1				1
WBGene00019017	F57F4.4	F57F4.4			1
WBGene00010204	F57F5.1	F57F5.1	1		1		1
WBGene00019026	F58A6.9	F58A6.9	1		1
WBGene00010241	F58D2.2	F58D2.2	1
WBGene00010242	F58D5.2	F58D5.2	1		1
WBGene00019036	F58E1.4	F58E1.4	1		1
WBGene00010251	F58E6.1	F58E6.1	1
WBGene00019061	F58F12.1	F58F12.1			1
WBGene00010277	F58G6.7	F58G6.7	1				1
WBGene00010292	F59A1.6	F59A1.6			1
WBGene00019098	F59B1.4	F59B1.4	1
WBGene00001385	far-1	F02A9.2		1
WBGene00001387	far-3	F15B9.1	1
WBGene00001394	fat-2	W02A2.1			1
WBGene00001398	fat-6	VZK822L.1	1		1
WBGene00013620	fbxa-111	Y102A5C.14					1
WBGene00022326	fbxa-14	Y82E9BL.10		1
WBGene00015599	fbxa-164	C08E3.7	1
WBGene00009427	fbxa-181	F35E12.3	1		1		1
WBGene00009840	fbxa-189	F47H4.9	1
WBGene00008632	fbxa-88	F10A3.2	1				1
WBGene00009222	fbxa-95	F28F8.4						1
WBGene00008613	fbxb-69	F09C3.5	1
WBGene00019072	fbxc-8	F58H7.7	1
WBGene00008751	fipr-14	F13E9.2				1		1
WBGene00001425	fis-2	F13B9.8	1		1
WBGene00001434	fkh-2	T14G12.4	1
WBGene00016007	flnb-1	C23F12.2	1
WBGene00001449	flp-6	F07D3.2	1
WBGene00001481	fog-1	Y54E10A.4				1
WBGene00001500	ftn-1	C54F6.14					1
WBGene00001501	ftn-2	D1037.3			1
WBGene00007703	gbf-1	C24H11.7	1		1
WBGene00007287	gck-4	C04A11.3		1		1		1
WBGene00001539	gcy-13	F23H12.6	1
WBGene00020131	gcy-28	T01A4.1		1
WBGene00001559	gei-1	F45H7.2				1		1
WBGene00001573	gei-16	T17H7.4	1
WBGene00001598	glh-1	T21G5.3		1
WBGene00001637	gly-12	F48E3.1				1
WBGene00001642	gly-17	T15D6.3						1
WBGene00001632	gly-7	Y46H3A.6						1
WBGene00020997	gpa-18	W03F8.9	1
WBGene00001668	gpa-6	F48C11.1	1
WBGene00001682	gpc-2	F08B6.2						1
WBGene00009824	gpdh-1	F47G4.3	1
WBGene00001725	grl-16	Y65B4BR.6	1		1
WBGene00001729	grl-20	C23H5.9		1
WBGene00001731	grl-22	W03A5.3	1		1		1
WBGene00001714	grl-5	Y47D7A.5	1		1
WBGene00001716	grl-7	T02E9.2	1		1
WBGene00001772	gst-24	F37B1.1	1
WBGene00010357	H03A11.2	H03A11.2		1				1
WBGene00019162	H06H21.3	H06H21.3			1
WBGene00019181	H10D18.6	H10D18.6						1
WBGene00019185	H10E21.5	H10E21.5	1
WBGene00019188	H11E01.3	H11E01.3		1		1
WBGene00019213	H20E11.1	H20E11.1				1
WBGene00019219	H20J04.4	H20J04.4		1		1
WBGene00019236	H23N18.5	H23N18.5	1		1
WBGene00019251	H28G03.3	H28G03.3	1
WBGene00019257	H32C10.3	H32C10.3						1
WBGene00019264	H35B03.2	H35B03.2	1
WBGene00010424	H36L18.2	H36L18.2			1
WBGene00001843	hgo-1	W06D4.1			1
WBGene00001935	his-61	F55G1.10	1		1
WBGene00001955	hlh-11	F58A4.7		1
WBGene00020930	hlh-30	W02C12.3		1		1		1
WBGene00001953	hlh-8	C02B8.4				1		1
WBGene00001984	hog-1	W06B11.4	1
WBGene00002001	hrs-1	T11G6.1		1
WBGene00002027	hsr-9	T05F1.6				1		1
WBGene00002053	ifb-1	F10C1.2	1
WBGene00002058	ifd-2	F25E2.4		1
WBGene00002068	ify-1	C27A2.3		1
WBGene00002071	ile-2	T04G9.3						1
WBGene00016669	ilys-2	C45G7.2	1
WBGene00016670	ilys-3	C45G7.3	1		1
WBGene00017691	ilys-5	F22A3.6	1		1		1
WBGene00020511	immt-1	T14G11.3		1
WBGene00002140	inx-18	C18H7.2	1		1
WBGene00002125	inx-3	F22F4.2	1		1		1
WBGene00007984	irx-1	C36F7.1	1
WBGene00019807	jamp-1	R01B10.5	1
WBGene00019278	K01A2.3	K01A2.3		1
WBGene00010446	K01A6.4	K01A6.4	1
WBGene00010468	K01D12.9	K01D12.9	1		1
WBGene00010484	K01H12.1	K01H12.1						1
WBGene00019311	K02E7.6	K02E7.6		1
WBGene00019365	K03E6.7	K03E6.7		1
WBGene00010554	K04C1.4	K04C1.4	1
WBGene00019392	K04F1.13	K04F1.13					1
WBGene00010596	K06A4.6	K06A4.6						1
WBGene00010597	K06A4.7	K06A4.7		1
WBGene00019439	K06B9.2	K06B9.2	1
WBGene00019441	K06B9.4	K06B9.4	1				1
WBGene00010605	K06G5.1	K06G5.1						1
WBGene00010610	K07A1.3	K07A1.3						1
WBGene00019463	K07A9.4	K07A9.4				1
WBGene00019503	K07H8.1	K07H8.1			1
WBGene00019518	K08B5.1	K08B5.1	1		1		1
WBGene00019519	K08B5.2	K08B5.2					1
WBGene00019540	K08D12.6	K08D12.6				1		1
WBGene00010657	K08D8.3	K08D8.3	1
WBGene00010660	K08D8.6	K08D8.6						1
WBGene00019551	K09C4.6	K09C4.6						1
WBGene00019560	K09C6.6	K09C6.6		1
WBGene00019585	K09F6.2	K09F6.2		1
WBGene00019592	K09F6.9	K09F6.9	1
WBGene00019599	K09H11.1	K09H11.1	1
WBGene00010734	K10C8.1	K10C8.1						1
WBGene00010746	K10D11.2	K10D11.2		1
WBGene00010742	K10D6.2	K10D6.2				1
WBGene00010753	K10G4.4	K10G4.4						1
WBGene00019660	K11H12.4	K11H12.4		1		1		1
WBGene00019681	K12H4.6	K12H4.6	1
WBGene00019682	K12H4.7	K12H4.7	1		1
WBGene00002196	kin-10	T01G9.6	1
WBGene00002207	kin-25	B0302.1		1		1		1
WBGene00002215	klc-2	C18C4.10						1
WBGene00002240	ksr-2	F58D5.4	1
WBGene00002251	lat-1	B0457.1	1
WBGene00002258	lbp-6	W02D3.5			1
WBGene00002265	lec-2	F52H3.7		1
WBGene00002271	lec-8	R07B1.10						1
WBGene00002272	lec-9	C16H3.2						1
WBGene00002280	let-2	F01G12.5	1
WBGene00002827	let-653	C29E6.1				1		1
WBGene00002979	lfe-2	C46H11.4	1
WBGene00022500	lfi-1	ZC8.4	1
WBGene00017483	lgc-22	F15E6.2	1
WBGene00022283	lgc-27	Y74E4A.1	1
WBGene00009799	lgc-47	F47A4.1	1					1
WBGene00023497	lin-15B	ZK662.4	1
WBGene00003037	lin-54	JC8.6	1
WBGene00014009	lips-6	ZK617.2			1
WBGene00003044	lir-1	F18A1.3	1
WBGene00001803	lite-1	C14F11.3	1
WBGene00016289	lntl-1	C31H1.6		1
WBGene00003086	lst-4	Y37A1B.2		1
WBGene00003090	lys-1	Y22F5A.4		1		1		1
WBGene00003099	lys-10	F17E9.11	1		1
WBGene00003091	lys-2	Y22F5A.5		1		1		1
WBGene00003092	lys-3	Y22F5A.6		1		1
WBGene00003093	lys-4	F58B3.1	1		1		1
WBGene00003094	lys-5	F58B3.2	1		1		1
WBGene00003096	lys-7	C02A12.4			1
WBGene00019693	M01A10.3	M01A10.3		1
WBGene00019697	M01B12.4	M01B12.4	1
WBGene00019721	M01H9.5	M01H9.5		1
WBGene00010830	M02G9.1	M02G9.1				1		1
WBGene00019744	M02H5.8	M02H5.8		1
WBGene00019746	M03A1.3	M03A1.3	1		1
WBGene00010843	M03C11.6	M03C11.6		1
WBGene00010931	M162.5	M162.5						1
WBGene00010939	M163.7	M163.7		1		1		1
WBGene00019779	M60.2	M60.2			1
WBGene00015248	mai-2	B0546.1			1
WBGene00020358	math-39	T08E11.2	1
WBGene00003144	max-2	Y38F1A.10					1
WBGene00007016	mdt-15	R12B2.5				1	1
WBGene00007019	mdt-19	Y71H2B.6						1
WBGene00003220	mes-2	R06A4.7				1		1
WBGene00003243	mig-10	F10E9.6	1
WBGene00003373	mlh-1	T28A8.7		1
WBGene00003409	mrp-3	E03G2.2	1
WBGene00003411	mrp-5	F14F4.3			1
WBGene00003425	msp-10	K07F5.2	1		1
WBGene00003469	msp-142	K05F1.2	1		1
WBGene00003430	msp-32	R05F9.3	1		1
WBGene00003434	msp-38	K08F4.8	1		1
WBGene00003438	msp-45	F58A6.8	1
WBGene00003442	msp-49	C34F11.6	1		1
WBGene00003443	msp-50	C34F11.4	1		1
WBGene00003444	msp-51	ZK354.5	1		1
WBGene00003449	msp-56	K07F5.3	1		1
WBGene00003452	msp-59	ZK354.11	1		1
WBGene00003456	msp-63	K05F1.7	1		1
WBGene00003463	msp-76	ZK1251.6	1		1
WBGene00003465	msp-78	T13F2.11	1		1
WBGene00003472	mtk-1	B0414.7				1		1
WBGene00003473	mtl-1	K11G9.6	1		1
WBGene00003474	mtl-2	T08G5.10	1		1
WBGene00003551	nas-33	K04E7.3	1
WBGene00003528	nas-9	C37H5.9		1
WBGene00003558	nca-2	C27F2.2	1
WBGene00003595	ngn-1	Y69A2AR.29				1
WBGene00003596	ngp-1	T19A6.2	1			1
WBGene00003610	nhr-11	ZC410.1	1
WBGene00003710	nhr-120	C25B8.6		1				1
WBGene00022097	nhr-242	Y69A2AR.26	1
WBGene00003623	nhr-25	F11C1.6				1		1
WBGene00022374	nhr-277	Y94H6A.1		1		1
WBGene00003630	nhr-40	T03G6.2				1
WBGene00003768	nlp-30	B0213.5	1
WBGene00015046	nlp-34	B0213.17			1
WBGene00007185	nlp-36	B0464.3					1
WBGene00003742	nlp-4	F59C6.6	1
WBGene00018117	nlp-47	F36H12.1						1
WBGene00003785	nos-3	Y53C12B.3	1
WBGene00003786	npa-1	VC5.3	1		1
WBGene00003796	npp-10	ZK328.5		1
WBGene00003799	npp-13	Y37E3.15				1
WBGene00003800	npp-14	C03D6.4	1
WBGene00013887	nspa-5	ZC412.6	1
WBGene00020860	nspd-10	T27C10.7	1		1
WBGene00010633	nspd-2	K07F5.5	1
WBGene00016058	nspd-3	C24D10.7	1
WBGene00020715	nspd-4	T23B7.1	1
WBGene00021280	nspd-8	Y23H5B.9	1
WBGene00003828	nuc-1	C07B5.5	1
WBGene00019401	nuo-4	K04G7.4					1
WBGene00021562	nuo-5	Y45G12B.1	1
WBGene00009180	nurf-1	F26H11.2				1
WBGene00008602	oac-14	F09B9.1		1
WBGene00003840	ocr-3	T10B10.7				1
WBGene00003884	osm-3	M02B7.3						1
WBGene00003922	pas-1	C15H11.7		1
WBGene00003930	pat-3	ZK1058.2		1	1			1
WBGene00003937	pax-1	K07C11.1				1
WBGene00003959	pcp-4	Y116F11B.3	1		1
WBGene00003961	pct-1	C07G1.3		1
WBGene00003969	pef-1	F23H11.8	1
WBGene00003986	pes-22	K05B2.5		1
WBGene00020237	phat-4	T05B4.3						1
WBGene00004038	plc-3	T01E8.3		1		1		1
WBGene00004057	pmk-3	F42G8.4		1
WBGene00004063	pmr-1	ZK256.1						1
WBGene00007554	pptr-2	C13G3.3						1
WBGene00004094	ppw-2	Y110A7A.18		1
WBGene00004116	pqn-27	E01G4.4				1
WBGene00004121	pqn-34	F35B3.5						1
WBGene00004123	pqn-36	F39D8.1		1		1
WBGene00004131	pqn-44	F55A12.9						1
WBGene00004139	pqn-54	R09B5.5	1
WBGene00004152	pqn-70	T19B10.4	1
WBGene00004157	pqn-75	W03D2.1	1
WBGene00004175	pqn-96	ZK1236.6				1
WBGene00004176	pqn-97	ZK488.10	1
WBGene00004210	ptc-3	Y110A2AL.8			1
WBGene00004213	ptp-1	C48D5.2	1		1
WBGene00004220	ptr-5	C53C11.3		1
WBGene00004245	puf-9	W06B11.2		1
WBGene00004254	pxf-1	T14G10.2	1		1
WBGene00004264	qua-1	T05C12.10	1
WBGene00010968	R01E6.2	R01E6.2	1
WBGene00010969	R01E6.5	R01E6.5	1
WBGene00010980	R02D5.7	R02D5.7	1
WBGene00019832	R02F2.2	R02F2.2	1
WBGene00019833	R02F2.4	R02F2.4			1
WBGene00011015	R04F11.2	R04F11.2	1
WBGene00019878	R05D3.3	R05D3.3				1
WBGene00019900	R05G6.7	R05G6.7			1
WBGene00011038	R05H5.3	R05H5.3	1		1
WBGene00019909	R06A10.1	R06A10.1	1		1		1
WBGene00011050	R06A4.8	R06A4.8				1
WBGene00011103	R07E3.2	R07E3.2	1
WBGene00011107	R07E3.6	R07E3.6	1
WBGene00011182	R09H10.5	R09H10.5			1
WBGene00011195	R10D12.14	R10D12.14		1
WBGene00011222	R10H10.3	R10H10.3	1
WBGene00020039	R12E2.14	R12E2.14	1
WBGene00020040	R12E2.15	R12E2.15	1		1
WBGene00011308	R186.7	R186.7	1		1		1
WBGene00011276	R53.7	R53.7		1		1
WBGene00011282	R74.8	R74.8		1
WBGene00007761	rad-26	C27B7.4						1
WBGene00004316	rbf-1	F37A4.7	1
WBGene00004323	rde-1	K08H10.7	1		1		1
WBGene00004344	rgs-1	C05B5.7		1
WBGene00007786	rmd-2	C27H6.4	1
WBGene00004373	rme-1	W06H8.1	1
WBGene00004375	rme-4	F46F6.1	1
WBGene00004378	rme-8	F18C12.2	1
WBGene00004394	rol-1	Y57A10A.11	1		1
WBGene00004398	rol-8	ZK1290.3	1
WBGene00004408	rpa-0	F25H2.10				1
WBGene00004412	rpl-1	Y71F9AL.13				1
WBGene00004424	rpl-12	JC8.3	1
WBGene00004429	rpl-17	Y48G8AL.8				1
WBGene00004434	rpl-22	C27A2.2						1
WBGene00004414	rpl-3	F13B10.2		1			1
WBGene00004452	rpl-38	C06B8.8		1
WBGene00004453	rpl-39	C26F1.9		1
WBGene00004483	rps-14	F37C12.9		1
WBGene00004742	scl-1	F49E11.9	1
WBGene00022638	scl-27	ZK6.3	1				1
WBGene00011935	scrm-1	T22H2.5	1
WBGene00018828	sdz-21	F54E7.5		1		1
WBGene00004751	sea-2	K10G6.3	1				1
WBGene00004776	ser-1	F59C12.2	1
WBGene00007403	set-3	C07A9.7		1				1
WBGene00018788	shc-1	F54A5.3			1
WBGene00004796	sid-2	ZK520.2		1
WBGene00004804	skn-1	T19E7.2				1
WBGene00004862	sma-9	T05A10.1				1
WBGene00004876	smf-1	K11G12.4		1
WBGene00004888	smo-1	K12C11.2			1
WBGene00004896	smu-2	Y49F6B.4		1
WBGene00004910	snf-11	T03F7.1						1
WBGene00004915	snr-2	W08E3.1			1
WBGene00010790	sodh-1	K12G11.3	1					1
WBGene00010868	somi-1	M04G12.4	1
WBGene00013747	spe-19	Y113G7A.10						1
WBGene00004999	spp-14	K09F5.3	1		1
WBGene00004987	spp-2	T08A9.12	1		1
WBGene00004988	spp-3	T08A9.7	1		1
WBGene00004989	spp-4	T08A9.8			1
WBGene00004990	spp-5	T08A9.9			1
WBGene00004994	spp-9	T25C12.2	1		1
WBGene00005016	sqt-1	B0491.2	1		1
WBGene00005017	sqt-2	C01B12.1	1
WBGene00005018	sqt-3	F23H12.4	1		1
WBGene00005044	sra-18	F28C12.2	1		1		1
WBGene00015958	srbc-11	C18B10.1	1
WBGene00010798	srbc-76	M01B2.4			1
WBGene00005101	srd-23	Y40H7A.5						1
WBGene00005103	srd-25	F07C4.4				1
WBGene00005109	srd-31	F07C4.8				1
WBGene00013276	sre-42	Y57A10B.4		1
WBGene00016832	sre-49	C50E10.9	1
WBGene00016834	sre-50	C50E10.11				1
WBGene00009242	sre-6	F28H7.9						1
WBGene00005213	srg-56	C24B9.10						1
WBGene00005237	srh-11	R09F10.6	1
WBGene00005394	srh-179	ZK228.7	1		1
WBGene00005421	srh-211	D1065.5	1
WBGene00005464	srh-258	T06E6.7	1
WBGene00005469	srh-263	T06E6.12				1
WBGene00005489	srh-284	C47A10.3	1
WBGene00005496	srh-292	Y94A7B.1						1
WBGene00005292	srh-71	T10D4.5	1
WBGene00005527	sri-15	F15H9.2	1
WBGene00005551	sri-39	F33H12.2	1
WBGene00008251	srsx-30	C51E3.5	1
WBGene00005876	srw-129	C44C3.2						1
WBGene00005774	srw-27	T05G11.4	1		1
WBGene00005778	srw-31	K03D7.2						1
WBGene00005811	srw-64	Y43B11AL.3				1
WBGene00005942	srx-51	T10H4.9						1
WBGene00011876	srz-6	T21B4.1		1				1
WBGene00006052	ssq-3	ZC477.1	1
WBGene00006056	sss-1	F32B6.5	1
WBGene00004109	stam-1	C34G6.7				1
WBGene00006082	str-14	T08G3.2	1
WBGene00006239	str-206	W06H8.7	1
WBGene00006275	str-248	C55A1.3				1
WBGene00006147	str-88	R08H2.2				1
WBGene00006364	syd-2	F59F5.6		1
WBGene00011329	T01D3.5	T01D3.5	1
WBGene00011330	T01D3.6	T01D3.6		1		1		1
WBGene00011338	T01G1.3	T01G1.3		1
WBGene00011350	T01H3.4	T01H3.4		1		1		1
WBGene00020166	T02G5.7	T02G5.7	1		1
WBGene00020181	T02H6.11	T02H6.11			1
WBGene00020176	T02H6.6	T02H6.6	1
WBGene00011434	T04D3.5	T04D3.5	1			1
WBGene00011449	T04H1.2	T04H1.2		1
WBGene00011487	T05E12.6	T05E12.6			1
WBGene00020263	T05E8.3	T05E8.3		1
WBGene00011594	T07G12.3	T07G12.3		1
WBGene00011604	T08A11.1	T08A11.1		1
WBGene00011630	T08G11.3	T08G11.3		1				1
WBGene00020369	T08H10.1	T08H10.1	1
WBGene00011638	T09A5.11	T09A5.11		1
WBGene00011657	T09E11.8	T09E11.8		1
WBGene00011647	T09E8.1	T09E8.1	1
WBGene00011678	T10B9.9	T10B9.9		1
WBGene00020462	T12E12.1	T12E12.1				1
WBGene00011737	T12G3.1	T12G3.1		1
WBGene00011802	T16G1.9	T16G1.9	1
WBGene00020551	T17H7.7	T17H7.7		1
WBGene00020579	T19D12.4	T19D12.4		1		1		1
WBGene00020597	T20B6.1	T20B6.1	1
WBGene00020626	T20F5.4	T20F5.4				1		1
WBGene00020628	T20F5.6	T20F5.6		1
WBGene00020636	T20H4.5	T20H4.5	1
WBGene00011880	T21B6.3	T21B6.3	1
WBGene00011895	T21C9.9	T21C9.9	1
WBGene00020654	T21E12.2	T21E12.2		1
WBGene00020662	T21H3.1	T21H3.1			1
WBGene00020678	T22B11.4	T22B11.4		1
WBGene00011918	T22C1.8	T22C1.8	1
WBGene00020688	T22D1.11	T22D1.11	1
WBGene00020701	T22F7.1	T22F7.1		1
WBGene00020703	T22F7.4	T22F7.4	1
WBGene00011940	T23B5.3	T23B5.3		1
WBGene00020729	T23E1.2	T23E1.2	1
WBGene00011963	T23G5.3	T23G5.3	1
WBGene00020753	T24A6.16	T24A6.16	1		1
WBGene00011979	T24B8.5	T24B8.5		1		1		1
WBGene00020760	T24C4.4	T24C4.4		1		1
WBGene00020774	T24E12.5	T24E12.5		1
WBGene00012011	T25B9.5	T25B9.5	1					1
WBGene00012018	T25C12.3	T25C12.3			1
WBGene00020803	T25E4.1	T25E4.1						1
WBGene00020833	T26C12.3	T26C12.3						1
WBGene00020834	T27A1.2	T27A1.2						1
WBGene00006392	taf-10	K03B4.3	1		1
WBGene00006474	tag-125	C14B1.4		1
WBGene00006495	tag-149	F31D5.3				1
WBGene00006518	tag-173	F27D4.5						1
WBGene00007256	tag-298	C01H6.7				1
WBGene00015061	tag-308	B0228.4		1				1
WBGene00011448	tag-348	T04H1.1		1
WBGene00006438	tag-60	C01F6.6						1
WBGene00006525	tax-2	F36F2.5	1
WBGene00006537	tbb-2	C36E8.5	1
WBGene00006553	tbx-34	Y47D3A.10	1
WBGene00009122	tct-1	F25H2.11		1
WBGene00009215	thn-2	F28D1.5	1		1
WBGene00006588	tnt-3	C14F5.3		1
WBGene00021470	tpxl-1	Y39G10AR.12	1
WBGene00013238	trap-4	Y56A3A.21			1
WBGene00006618	trt-1	DY3.4						1
WBGene00006636	tsp-10	T14B4.4			1
WBGene00012712	ttm-1	Y39E4A.2	1
WBGene00017600	ttr-10	F19F10.4	1
WBGene00012382	ttr-16	Y5F2A.1		1
WBGene00013079	ttr-26	Y51A2D.11				1
WBGene00010234	ttr-50	F58B3.9	1
WBGene00020886	ttr-6	T28B4.3		1
WBGene00006692	twk-42	W06D12.2	1		1		1
WBGene00008486	ugt-44	F01D4.2		1		1		1
WBGene00006830	unc-103	C30D11.1	1
WBGene00006832	unc-105	C41C4.5						1
WBGene00006759	unc-22	ZK617.1		1
WBGene00006780	unc-44	B0350.2	1			1		1
WBGene00006808	unc-76	C01G10.11						1
WBGene00006817	unc-85	F10G7.3	1
WBGene00013241	ung-1	Y56A3A.29	1
WBGene00006886	vap-1	F11C7.3	1
WBGene00006888	vbh-1	Y54E10A.9	1
WBGene00006925	vit-1	K09F5.2					1
WBGene00006926	vit-2	C42D8.2			1
WBGene00006927	vit-3	F59D8.1	1		1		1
WBGene00006928	vit-4	F59D8.2			1		1
WBGene00006929	vit-5	C04F6.1	1		1
WBGene00006930	vit-6	K07H8.6			1
WBGene00012207	W02B12.12	W02B12.12		1
WBGene00020926	W02B3.6	W02B3.6	1		1		1
WBGene00020943	W02D7.8	W02D7.8						1
WBGene00020982	W03D2.7	W03D2.7	1		1
WBGene00021022	W04B5.5	W04B5.5	1
WBGene00012256	W04G3.2	W04G3.2			1
WBGene00021043	W05G11.6	W05G11.6			1
WBGene00021065	W06E11.7	W06E11.7		1
WBGene00021067	W06H8.4	W06H8.4				1
WBGene00021080	W08A12.3	W08A12.3						1
WBGene00021089	W08E12.8	W08E12.8						1
WBGene00021109	W09C3.1	W09C3.1	1
WBGene00012356	W09D6.1	W09D6.1	1
WBGene00021121	W09G12.7	W09G12.7	1
WBGene00006938	wee-1.1	F35H8.7		1		1		1
WBGene00013658	Y105C5B.19	Y105C5B.19	1		1
WBGene00013667	Y105E8A.2	Y105E8A.2		1
WBGene00013668	Y105E8A.3	Y105E8A.3	1
WBGene00013720	Y106G6H.8	Y106G6H.8	1
WBGene00013730	Y111B2A.4	Y111B2A.4				1
WBGene00013784	Y116A8C.3	Y116A8C.3		1				1
WBGene00013812	Y116A8C.40	Y116A8C.40		1
WBGene00013816	Y116F11A.1	Y116F11A.1	1		1		1
WBGene00022472	Y119C1B.6	Y119C1B.6		1
WBGene00012445	Y16B4A.2	Y16B4A.2	1
WBGene00012463	Y17G7B.10	Y17G7B.10					1
WBGene00012465	Y17G7B.12	Y17G7B.12	1		1
WBGene00021239	Y20F4.4	Y20F4.4						1
WBGene00021253	Y22D7AL.15	Y22D7AL.15		1
WBGene00023172	Y23H5A.8	Y23H5A.8	1
WBGene00021278	Y23H5B.7	Y23H5B.7	1
WBGene00012499	Y24F12A.4	Y24F12A.4	1
WBGene00012550	Y37D8A.10	Y37D8A.10		1
WBGene00021367	Y37E11AM.3	Y37E11AM.3	1
WBGene00012636	Y38H8A.2	Y38H8A.2		1				1
WBGene00012643	Y39A1A.3	Y39A1A.3		1
WBGene00012664	Y39B6A.1	Y39B6A.1	1		1		1
WBGene00012668	Y39B6A.5	Y39B6A.5				1
WBGene00012710	Y39C12A.9	Y39C12A.9						1
WBGene00012720	Y39E4B.11	Y39E4B.11	1		1		1
WBGene00021507	Y41D4A.5	Y41D4A.5	1
WBGene00021518	Y41D4B.16	Y41D4B.16				1
WBGene00021519	Y41D4B.17	Y41D4B.17				1
WBGene00012766	Y41E3.8	Y41E3.8				1
WBGene00021536	Y42H9AR.1	Y42H9AR.1				1
WBGene00021537	Y42H9AR.2	Y42H9AR.2				1
WBGene00012790	Y43D4A.4	Y43D4A.4	1		1		1
WBGene00012814	Y43F8B.3	Y43F8B.3		1				1
WBGene00012854	Y44A6D.3	Y44A6D.3				1
WBGene00012866	Y45F10A.3	Y45F10A.3	1				1
WBGene00012864	Y45F3A.9	Y45F3A.9	1		1		1
WBGene00021563	Y45G12B.2	Y45G12B.2		1				1
WBGene00012912	Y46G5A.22	Y46G5A.22			1
WBGene00021625	Y47D7A.13	Y47D7A.13	1		1
WBGene00021627	Y47D7A.15	Y47D7A.15	1		1
WBGene00012978	Y48B6A.1	Y48B6A.1					1
WBGene00012979	Y48B6A.5	Y48B6A.5		1
WBGene00012993	Y48C3A.11	Y48C3A.11	1
WBGene00013006	Y48E1B.7	Y48E1B.7	1
WBGene00021690	Y48G8AL.12	Y48G8AL.12			1
WBGene00021686	Y48G8AL.5	Y48G8AL.5				1
WBGene00021701	Y48G9A.7	Y48G9A.7	1
WBGene00021158	Y4C6B.4	Y4C6B.4	1
WBGene00021160	Y4C6B.6	Y4C6B.6			1
WBGene00021733	Y50C1A.1	Y50C1A.1		1
WBGene00013048	Y50E8A.5	Y50E8A.5						1
WBGene00013072	Y51A2D.1	Y51A2D.1	1
WBGene00021763	Y51F10.2	Y51F10.2	1
WBGene00021777	Y51H7BR.5	Y51H7BR.5		1				1
WBGene00021779	Y51H7C.1	Y51H7C.1	1
WBGene00021791	Y51H7C.13	Y51H7C.13			1
WBGene00021805	Y53G8AM.5	Y53G8AM.5	1
WBGene00013203	Y54E5A.8	Y54E5A.8	1
WBGene00021847	Y54F10AL.1	Y54F10AL.1		1
WBGene00021892	Y54G2A.28	Y54G2A.28					1
WBGene00013207	Y54G9A.4	Y54G9A.4			1
WBGene00013263	Y57A10A.23	Y57A10A.23	1
WBGene00013273	Y57A10B.1	Y57A10B.1		1		1
WBGene00021977	Y58A7A.3	Y58A7A.3		1
WBGene00021978	Y58A7A.4	Y58A7A.4				1
WBGene00022040	Y65B4BR.1	Y65B4BR.1	1		1
WBGene00022049	Y66H1B.3	Y66H1B.3		1		1		1
WBGene00022065	Y67D8C.1	Y67D8C.1				1
WBGene00013463	Y67H2A.5	Y67H2A.5			1
WBGene00022078	Y69A2AR.7	Y69A2AR.7		1				1
WBGene00022107	Y71F9AL.1	Y71F9AL.1	1
WBGene00022134	Y71G10AL.1	Y71G10AL.1	1
WBGene00022144	Y71G12B.4	Y71G12B.4	1
WBGene00022147	Y71G12B.7	Y71G12B.7		1
WBGene00022170	Y71H2AM.5	Y71H2AM.5	1
WBGene00022218	Y73B3A.16	Y73B3A.16						1
WBGene00022219	Y73B3A.18	Y73B3A.18				1
WBGene00022258	Y73C8B.1	Y73C8B.1	1
WBGene00013550	Y75B8A.14	Y75B8A.14	1
WBGene00013561	Y75B8A.31	Y75B8A.31				1
WBGene00013574	Y76A2B.2	Y76A2B.2		1		1
WBGene00022380	Y94H6A.8	Y94H6A.8						1
WBGene00021186	Y9D1A.1	Y9D1A.1	1
WBGene00022599	ZC395.10	ZC395.10			1
WBGene00022605	ZC404.11	ZC404.11	1		1		1
WBGene00013883	ZC412.1	ZC412.1		1
WBGene00013846	ZC84.1	ZC84.1	1
WBGene00006986	zip-1	Y75B8A.35		1
WBGene00012330	zip-3	W07G1.3				1
WBGene00022844	ZK1055.3	ZK1055.3		1
WBGene00014227	ZK1128.1	ZK1128.1						1
WBGene00014230	ZK1128.4	ZK1128.4						1
WBGene00014239	ZK1225.5	ZK1225.5	1		1
WBGene00014246	ZK1307.3	ZK1307.3	1
WBGene00014253	ZK1320.3	ZK1320.3		1				1
WBGene00014261	ZK1321.2	ZK1321.2	1
WBGene00022674	ZK177.9	ZK177.9				1
WBGene00022679	ZK180.5	ZK180.5	1
WBGene00022680	ZK180.6	ZK180.6	1
WBGene00013959	ZK265.7	ZK265.7		1
WBGene00022698	ZK353.2	ZK353.2		1		1
WBGene00022705	ZK354.2	ZK354.2						1
WBGene00014001	ZK593.1	ZK593.1	1
WBGene00014006	ZK596.1	ZK596.1	1
WBGene00022645	ZK6.11	ZK6.11		1		1		1
WBGene00022642	ZK6.7	ZK6.7	1		1
WBGene00014017	ZK632.10	ZK632.10	1		1
WBGene00014016	ZK632.9	ZK632.9			1
WBGene00014022	ZK637.2	ZK637.2	1
WBGene00014042	ZK666.2	ZK666.2	1		1
WBGene00014058	ZK673.2	ZK673.2		1
WBGene00022811	ZK721.4	ZK721.4					1
WBGene00022813	ZK742.3	ZK742.3	1		1
WBGene00014075	ZK757.4	ZK757.4					1
WBGene00014100	ZK849.1	ZK849.1						1
WBGene00014135	ZK896.4	ZK896.4		1		1		1
WBGene00014136	ZK896.5	ZK896.5		1		1		1
WBGene00014148	ZK909.3	ZK909.3	1		1
WBGene00022835	ZK973.9	ZK973.9	1				1
WBGene00006987	zmp-1	EGAP1.3	1
WBGene00016905	ztf-3	C53D5.4	1		1
WBGene00013966	ztf-9	ZK287.6	1		1
Note: Gene names according to wormbase version WB195
Note: Significant differential regulation is denoted by "1"; blank indicates no significance

## Sheet: GeneDescription_DomainTitle
Table summarizes the Gene Description and the protein domain titles of the differentially expressed genes that showed an identical expression pattern in the C. elegans strains MY15 and MY18 and/or N2
GENE WB ID	Gene public name	EuGene	Expression-Pattern	Gene Description (Concise)	Protein
					Domain Title	Domain Title	Domain Title	Domain Title	Domain Title	Domain Title	Domain Title	Domain Title	Domain Title	Domain Title
WBGene00000107	alh-1	F54D8.3	MY15/MY18_DOWN	alh-1 is orthologous to the human gene ALDEHYDE DEHYDROGENASE 2, MITOCHONDRIAL (ALDH2; OMIM:100650), in which a polymorphism can lead to acute ethanol intolerance.	Aldehyde dehydrogenase	Aldehyde dehydrogenase, C-terminal	Aldehyde dehydrogenase, N-terminal
WBGene00000216	asp-3	H22K11.1	MY15/MY18_DOWN	asp-3 encodes an aspartyl protease homolog that is required, in parallel with ASP-4 but downstream of CLP-1 and TRA-3, for degenerative (necrotic-like) cell death in neurons induced by mutations such as mec-4(d), deg-3(d), or gsa-1(gf).	Eukaryotic aspartyl protease	Peptidase A1	Peptidase aspartic, active site	Peptidase aspartic, catalytic
WBGene00000252	bli-2	F59E12.12	MY15/MY18_DOWN	A cuticle collagen involved in strut assembly in the adult cuticle.
WBGene00000254	bli-4	K04F10.4	MY15/MY18/N2_UP	bli-4 encodes a variety of related subtilases (serine endoproteases of the KEX2/subtilisin class), with shared N-termini but varying C-termini, that are collectively required both for larval viability and for stable adhesion of the adult cuticle.	Furin-like repeat	Peptidase S8 and S53, subtilisin, kexin, sedolisin	Peptidase S8, subtilisin-related	Subtilase family
WBGene00000477	cft-1	C18C4.2	MY15/MY18_DOWN		ABC transporter integral membrane type 1	ABC transporter-like	Beta-lactamase, class A/D
WBGene00000606	col-17	F11G11.10	MY15/MY18_DOWN	col-17 encodes a collagen which is expressed in all developmental stages except eggs, like col-15, col-16, and col-20; collagen genes with this expression pattern may be used for synthesis of cuticles after the L1 stage (e.g., the L4 cuticle).
WBGene00000636	col-60	F22D6.10	MY15/MY18_DOWN
WBGene00000639	col-63	ZK265.2	MY15/MY18_DOWN
WBGene00000686	col-112	Y73B6BL.34	MY15/MY18_DOWN
WBGene00000745	col-172	F38B6.5	MY15/MY18_DOWN
WBGene00000781	cpr-1	C52E4.1	MY15/MY18/N2_DOWN	cpr-1 encodes a cysteine protease of the cathepsin B-like cysteine protease family; cpr-1 appears to be required for embryogenesis; cpr-1 is specifically expressed in the gut of all stages except the embryo and around developing embryos in the gonad; expression of cpr-1 is regulated by three promoter GATA motifs.	Papain family cysteine protease	Peptidase C1A, papain	Peptidase C1A, papain C-terminal	Peptidase, cysteine peptidase active site
WBGene00000782	cpr-2	F36D3.9	MY15/MY18_DOWN		Papain family cysteine protease	Peptidase C1A, papain	Peptidase C1A, papain C-terminal	Peptidase, cysteine peptidase active site
WBGene00000783	cpr-3	T10H4.12	MY15/MY18/N2_UP		Papain family cysteine protease	Peptidase C1A, papain	Peptidase C1A, papain C-terminal	Peptidase, cysteine peptidase active site
WBGene00000785	cpr-5	W07B8.5	MY15/MY18/N2_DOWN	cpr-5 encodes a cysteine protease.	Papain family cysteine protease	Peptidase C1A, papain	Peptidase C1A, papain C-terminal	Peptidase, cysteine peptidase active site
WBGene00000786	cpr-6	C25B8.3	MY15/MY18_DOWN		Papain family cysteine protease	Peptidase C1A, papain	Peptidase C1A, papain C-terminal	Peptidase, cysteine peptidase active site
WBGene00001074	dpy-13	F30B5.1	MY15/MY18_DOWN	dpy-13 encodes a member of the collagen superfamily containing 20 copies of the collagen triple helix repeat; transcipt levels oscillate, peaking once during each larval stage.
WBGene00001155	ech-6	T05G5.6	MY15/MY18/N2_DOWN		Crontonase, C-terminal	Crotonase, core	Enoyl-CoA hydratase/isomerase family
WBGene00001244	elo-6	F41H10.8	MY15/MY18_DOWN	The elo-6 gene encodes a paralog of elo-1 and elo-2, each of which encodes a polyunsaturated fatty acid (PUFA) elongase; ELO-6 may be required for a normally high growth rate.	GNS1/SUR4 family	GNS1/SUR4 membrane protein
WBGene00001398	fat-6	VZK822L.1	MY15/MY18_DOWN	fat-6 encodes a delta-9 fatty acid desaturase that is predicted to be mitochondrial.	Fatty acid desaturase, type 1, core
WBGene00001425	fis-2	F13B9.8	MY15/MY18_DOWN		Tetratricopeptide repeat 11 Fission 1 protein	Tetratricopeptide-like helical
WBGene00001714	grl-5	Y47D7A.5	MY15/MY18_DOWN	grl-5 encodes a hedgehog-like protein, with an N-terminal signal sequence, a central proline-rich low-complexity region, and a C-terminal Ground-like (Grl) domain; the Grl domain is predicted to form a cysteine-crosslinked protein involved in intercellular signalling, and it has subtle similarity to the N-terminal Hedge domain of HEDGEHOG proteins.	Ground-like domain	Ground-like region
WBGene00001716	grl-7	T02E9.2	MY15/MY18_DOWN	grl-7 encodes a hedgehog-like protein, with an N-terminal signal sequence, a central low-complexity region, and a C-terminal Ground-like (Grl) domain; GRL-7 is expressed in intestine, hypodermis, and seam cells; the Grl domain is predicted to form a cysteine-crosslinked protein involved in intercellular signalling, and it has subtle similarity to the N-terminal Hedge domain of HEDGEHOG proteins.	Ground-like domain	Ground-like region
WBGene00001725	grl-16	Y65B4BR.6	MY15/MY18_DOWN	grl-16 encodes, by alternative splicing, two hedgehog-like proteins with an N-terminal signal sequence, a central proline-rich low-complexity region, and a C-terminal Ground-like (Grl) domain; the Grl domain is predicted to form a cysteine-crosslinked protein involved in intercellular signalling, and it has subtle similarity to the N-terminal Hedge domain of HEDGEHOG proteins.	Ground-like domain	Ground-like region
WBGene00001731	grl-22	W03A5.3	MY15/MY18/N2_DOWN	grl-22 encodes a hedgehog-like protein, with an N-terminal signal sequence, a central proline-rich low-complexity region, and a C-terminal Ground-like (Grl) domain; the Grl domain is predicted to form a cysteine-crosslinked protein involved in intercellular signalling, and it has subtle similarity to the N-terminal Hedge domain of HEDGEHOG proteins.	Ground-like domain	Ground-like region
WBGene00001935	his-61	F55G1.10	MY15/MY18_DOWN	his-61 encodes an H2A histone.	Core histone H2A/H2B/H3/H4	Histone core	Histone H2A	Histone-fold
WBGene00002125	inx-3	F22F4.2	MY15/MY18/N2_DOWN		Innexin
WBGene00002140	inx-18	C18H7.2	MY15/MY18_DOWN	inx-18 encodes a predicted member of the innexin family.	Innexin
WBGene00002207	kin-25	B0302.1	MY15/MY18/N2_UP	kin-25 encodes a nonreceptor tyrosine kinase that is a member of the Ack subfamily of cytoplasmic tyrosine kinases.	Protein kinase, core	Protein tyrosine kinase	Serine/threonine protein kinase	Src homology-3 domain	Tyrosine protein kinase	Tyrosine protein kinase, active site
WBGene00003090	lys-1	Y22F5A.4	MY15/MY18/N2_UP	lys-1 encodes a putative lysozyme, whose overexpression increases resistance to infection by Serratia marcescens; lys-1(RNAi) animals have normal resistance to S. marcescens, perhaps because of genetic redundancy with the LYS-1 paralogs LYS-2 to -8 and LYS-10; in uninfected animals, LYS-1 is expressed in the intestine and in IL1/IL2 neurons, along with a few unidentified head neurons; in intestin…	Glycoside hydrolase, subgroup, catalytic core
WBGene00003091	lys-2	Y22F5A.5	MY15/MY18/N2_UP	lys-2 is one of ten C. elegans lysozyme genes; as such, lys-2 can be predicted to have a role in lysozymal function including immune function.	Glycoside hydrolase, subgroup, catalytic core
WBGene00003092	lys-3	Y22F5A.6	MY15/MY18_UP	lys-3 encodes one of a family of ten C. elegans lysozyme genes that are homologous to lysozymes in the amoeboid protozoon Entamoeba histolytica.	Glycoside hydrolase, subgroup, catalytic core
WBGene00003093	lys-4	F58B3.1	MY15/MY18/N2_DOWN		Glycoside hydrolase, family 25	Glycoside hydrolase, subgroup, catalytic core	Glycosyl hydrolases family 25
WBGene00003094	lys-5	F58B3.2	MY15/MY18/N2_DOWN		Glycoside hydrolase, family 25	Glycoside hydrolase, subgroup, catalytic core	Glycosyl hydrolases family 25
WBGene00003099	lys-10	F17E9.11	MY15/MY18_DOWN		Glycoside hydrolase, subgroup, catalytic core
WBGene00003425	msp-10	K07F5.2	MY15/MY18_DOWN	msp-10 encodes a protein that belongs to a family of proteins called the Major Sperm Proteins (MSPs) that is conserved in nematodes; this family consists of closely related, small, basic proteins that make up 15% of sperm protein; this multigene family consists of over fifty genes, including many pseudogenes; MSPs are involved in both extracellular signaling and cytoskeletal functions during repr…	Major sperm protein	MSP (Major sperm protein) domain	PapD-like
WBGene00003430	msp-32	R05F9.3	MY15/MY18_DOWN	msp-32 encodes a protein that belongs to a family of proteins called the Major Sperm Proteins (MSPs) that is conserved in nematodes; msp-32 has a C. briggsae homolog as predicted by the Wobble Aware Bulk Aligner (WABA); the msp family consists of closely related, small, basic proteins that make up 15% of sperm protein; this multigene family consists of over fifty genes, including many pseudogenes…	Major sperm protein	MSP (Major sperm protein) domain	PapD-like
WBGene00003434	msp-38	K08F4.8	MY15/MY18_DOWN	msp-38 encodes a member of the major sperm protein family; msp-38 has a C. briggsae homolog as predicted by the Wobble Bulk Aware Bulk Aligner (WABA).	Major sperm protein	MSP (Major sperm protein) domain	PapD-like
WBGene00003442	msp-49	C34F11.6	MY15/MY18_DOWN	msp-49 encodes a protein that belongs to a family of proteins called the Major Sperm Proteins (MSPs) that is conserved in nematodes; this family consists of closely related, small, basic proteins that make up 15% of sperm protein; this multigene family consists of over fifty genes, including many pseudogenes; MSPs are involved in both extracellular signaling and cytoskeletal functions during repr…	Major sperm protein	MSP (Major sperm protein) domain	PapD-like
WBGene00003443	msp-50	C34F11.4	MY15/MY18_DOWN	msp-50 encodes a protein that belongs to a family of proteins called the Major Sperm Proteins (MSPs) that is conserved in nematodes; this family consists of closely related, small, basic proteins that make up 15% of sperm protein; this multigene family consists of over fifty genes, including many pseudogenes; MSPs are involved in both extracellular signaling and cytoskeletal functions during repr…	Major sperm protein	MSP (Major sperm protein) domain	PapD-like
WBGene00003444	msp-51	ZK354.5	MY15/MY18_DOWN	msp-51 encodes a protein that belongs to a family of proteins called the Major Sperm Proteins (MSPs) that is conserved in nematodes; msp-51 has a C. briggsae homolog as predicted by the Wobble Aware Bulk Aligner (WABA); the MSP family consists of closely related, small, basic proteins that make up 15% of sperm protein; this multigene family consists of over fifty genes, including many pseudogenes…	Major sperm protein	MSP (Major sperm protein) domain	PapD-like
WBGene00003449	msp-56	K07F5.3	MY15/MY18_DOWN	msp-56 encodes a protein that belongs to a family of proteins called the Major Sperm Proteins (MSPs) that is conserved in nematodes; this family consists of closely related, small, basic proteins that make up 15% of sperm protein; this multigene family consists of over fifty genes, including many pseudogenes; MSPs are involved in both extracellular signaling and cytoskeletal functions during repr…	Major sperm protein	MSP (Major sperm protein) domain	PapD-like
WBGene00003452	msp-59	ZK354.11	MY15/MY18_DOWN	msp-59 encodes a member of the major sperm protein family.	Major sperm protein	MSP (Major sperm protein) domain	PapD-like
WBGene00003456	msp-63	K05F1.7	MY15/MY18_DOWN	msp-63 encodes a protein that belongs to a family of proteins called the Major Sperm Proteins (MSPs) that is conserved in nematodes; this family consists of closely related, small, basic proteins that make up 15% of sperm protein; this multigene family consists of over fifty genes, including many pseudogenes; MSPs are involved in both extracellular signaling and cytoskeletal functions during repr…	Major sperm protein	MSP (Major sperm protein) domain	PapD-like
WBGene00003463	msp-76	ZK1251.6	MY15/MY18_DOWN	msp-76 encodes a protein that belongs to a family of proteins called the Major Sperm Proteins (MSPs) that is conserved in nematodes; this family consists of closely related, small, basic proteins that make up 15% of sperm protein; this multigene family consists of over fifty genes, including many pseudogenes; MSPs are involved in both extracellular signaling and cytoskeletal functions during repr…	Major sperm protein	MSP (Major sperm protein) domain	PapD-like
WBGene00003465	msp-78	T13F2.11	MY15/MY18_DOWN	msp-78 encodes a protein that belongs to a family of proteins called the Major Sperm Proteins (MSPs) that is conserved in nematodes; this family consists of closely related, small, basic proteins that make up 15% of sperm protein; this multigene family consists of over fifty genes, including many pseudogenes; MSPs are involved in both extracellular signaling and cytoskeletal functions during repr…	Major sperm protein	MSP (Major sperm protein) domain	PapD-like
WBGene00003469	msp-142	K05F1.2	MY15/MY18_DOWN	msp-142 encodes a protein that belongs to a family of proteins called the Major Sperm Proteins (MSPs) that is conserved in nematodes; this family consists of closely related, small, basic proteins that make up 15% of sperm protein; this multigene family consists of over fifty genes, including many pseudogenes; MSPs are involved in both extracellular signaling and cytoskeletal functions during rep…	Major sperm protein	MSP (Major sperm protein) domain	PapD-like
WBGene00003473	mtl-1	K11G9.6	MY15/MY18_DOWN	mtl-1 encodes one of two C. elegans metallothioneins, small, cysteine-rich, metal-binding proteins; MTL-1 functions in metal detoxification and homeostasis and in stress adaptation; in addition, mtl-1 plays a role in regulating growth and fertility; mtl-1 is constitutively expressed in the terminal bulb of the pharynx and expression is induced in larval intestinal cells following exposure to cadm…	Metallothionein	Nematoda metallothionein, family 6	Plant metallothionein, family 15
WBGene00003474	mtl-2	T08G5.10	MY15/MY18_DOWN	mtl-2 encodes one of two C. elegans metallothioneins, small, cysteine-rich, metal-binding proteins; MTL-2 functions in metal detoxification and homeostasis and stress adaptation; in addition, mtl-2 plays a role in regulating growth and fertility; mtl-2 expression is induced in larval and adult intestinal cells following exposure to cadmium or heat shock; MTL-2 intestinal expression is dependent u…	Metallothionein	Nematoda metallothionein, family 6	Plant metallothionein, family 15
WBGene00003786	npa-1	VC5.3	MY15/MY18_DOWN	npa-1 encodes a large polyprotein precursor that is posttranslationally cleaved to multiple units of ~14.5kDa, each of which is a strong binding protein for fatty acids and retinol (Vitamin A); the lipid binding sites of NPA-1-derived peptides are unusually apolar; NPA-1-derived peptides probably are carrier proteins that enable distribution of these lipids within nematodes; NPA-1-derived peptide…
WBGene00003959	pcp-4	Y116F11B.3	MY15/MY18_DOWN		Peptidase S28	Serine carboxypeptidase S28
WBGene00004038	plc-3	T01E8.3	MY15/MY18/N2_UP		C2 calcium-dependent membrane targeting	Phosphatidylinositol-4, 5-bisphosphate phosphodiesterase gamma	Phospholipase C, phosphatidylinositol-specific , X region	Phospholipase C, phosphatidylinositol-specific, Y domain	Phospholipase C, phosphoinositol-specific, C-terminal (PLC)	PLC-like phosphodiesterase, TIM beta/alpha-barrel domain	Pleckstrin homology	SH2 motif	Src homology-3 domain
WBGene00004123	pqn-36	F39D8.1	MY15/MY18_UP	The protein product of this gene is predicted to contain a glutamine/asparagine (Q/N)-rich ('prion') domain, by the algorithm of Michelitsch and Weissman (as of the WS77 release of WormBase, i.e., in wormpep77).
WBGene00004213	ptp-1	C48D5.2	MY15/MY18_DOWN	ptp-1 encodes a non-receptor tyrosine phosphatase containing Band 4.1 and PDZ domains that may function in linking cytoplasmic proteins and signaling molecules to sites on the plasma membrane; by homology, PTP-1 is predicted to function in cell signaling, but as loss of PTP-1 function via RNA-mediated interference (RNAi) does not result in any abnormalities, the precise role of PTP-1 in C. elegan…	Band 4.1, N-terminal	FERM/acyl-CoA-binding protein, 3-helical bundle	PDZ domain (Also known as DHR or GLGF)	PDZ/DHR/GLGF	Pleckstrin homology-type	Protein-tyrosine phosphatase	Protein-tyrosine phosphatase, active site	Protein-tyrosine phosphatase, catalytic	Protein-tyrosine phosphatase, non-receptor type-3, -4	Protein-tyrosine phosphatase, receptor/non-receptor type
WBGene00004254	pxf-1	T14G10.2	MY15/MY18_DOWN		Cyclic nucleotide-binding	Guanine nucleotide exchange factor for Ras-like GTPases, N-terminal	Guanine nucleotide exchange factor for Ras-like GTPases; N-terminal motif	Guanine-nucleotide dissociation stimulator CDC25	PDZ/DHR/GLGF	Ras guanine nucleotide exchange factor	Ras-association	RmlC-like jelly roll fold
WBGene00004323	rde-1	K08H10.7	MY15/MY18/N2_DOWN	rde-1 encodes a novel, conserved protein that is a member of the PIWI/STING/Argonaute/Zwille/eIF2c family of proteins; rde-1 activity is required for RNA-mediated interference (RNAi), likely at a point after small interfering RNAs (siRNAs) have been produced from dsRNA triggers; RDE-1 interacts with RDE-4 in vivo and its activity is also required for accumulation of dsRNA bound to RDE-4.	Stem cell self-renewal protein Piwi
WBGene00004394	rol-1	Y57A10A.11	MY15/MY18_DOWN	rol-1 encodes a nematode cuticular collagen required for normal body morphology at the adult stage of development; rol-1 expression is under the control of the heterochronic pathway, as heterochronic mutants that synthesize adult cuticle early produce animals that roll as larvae, while heterochronic mutants that fail to execute normal adult development never display the roller phenotype.
WBGene00004987	spp-2	T08A9.12	MY15/MY18_DOWN	spp-2 is orthologous to the human gene INTERFERON GAMMA RECEPTOR 2 (INTERFERON GAMMA TRANSDUCER 1) (IFNGR2; OMIM:147569), which when mutated leads to disease.	Saposin B	Saposin-like	Saposin-like type B, 2	Saposin-like type B, region 2
WBGene00004988	spp-3	T08A9.7	MY15/MY18_DOWN		Saposin B	Saposin-like	Saposin-like type B, 2	Saposin-like type B, region 2
WBGene00004994	spp-9	T25C12.2	MY15/MY18_DOWN		Saposin B	Saposin-like	Saposin-like type B, 2	Saposin-like type B, region 2
WBGene00004999	spp-14	K09F5.3	MY15/MY18_DOWN		Saposin B	Saposin-like	Saposin-like type B, 2	Saposin-like type B, region 2
WBGene00005016	sqt-1	B0491.2	MY15/MY18_DOWN	sqt-1 encodes a cuticle collagen; during larval and adult development, sqt-1 activity is required, likely redundantly, for normal cuticle, and hence organismal, morphology; sqt-1 mRNA abundance oscillates during larval development, peaking at one point during each larval stage and peaking again in adults; sqt-1 transcripts are also detected in animals at the L1-L2d molt; in the temporally distinc…
WBGene00005018	sqt-3	F23H12.4	MY15/MY18_DOWN	sqt-3 encodes a cuticle collagen; during development, sqt-3 activity is essential for viability and normal body morphology; genetic and expression studies indicate that SQT-3 is a cuticle component at all stages of development and that SQT-3 likely forms higher order cuticular structures with the DPY-17 cuticular collagen, both of which are candidate substrates for the DPY-31 procollagen C-protei…
WBGene00005044	sra-18	F28C12.2	MY15/MY18/N2_DOWN		Nematode chemoreceptor, Sra	Serpentine type 7TM GPCR chemoreceptor Sra
WBGene00005394	srh-179	ZK228.7	MY15/MY18_DOWN		Serpentine type 7TM GPCR chemoreceptor Srh
WBGene00005774	srw-27	T05G11.4	MY15/MY18_DOWN
WBGene00006392	taf-10	K03B4.3	MY15/MY18_DOWN		Transcription initiation factor TFIID 23-30kDa subunit	Transcription initiation factor TFIID, 23-30 kDa subunit
WBGene00006692	twk-42	W06D12.2	MY15/MY18/N2_DOWN		Potassium channel, two pore-domain
WBGene00006927	vit-3	F59D8.1	MY15/MY18/N2_DOWN	vit-3 encodes a vitellogenin, a precursor of the lipid-binding protein related to vertebrate vitellogenins and mammalian ApoB-100, a core LDL particle constituent (OMIM:107730); VIT-3 is a major yolk component, but as loss of VIT-3 activity via RNA-mediated interference (RNAi) does not result in any abnormalities, VIT-3 likely functions redundantly with other vitellogenins to provide essential nu…	Lipid transport protein, N-terminal	Lipoprotein amino terminal region	Vitellinogen, beta-sheet N-terminal	Vitellinogen, open beta-sheet, subdomain 2	Vitellinogen, superhelical	von Willebrand factor, type D
WBGene00006929	vit-5	C04F6.1	MY15/MY18_DOWN	vit-5 encodes a vitellogenin, a lipid-binding protein precursor related to vertebrate vitellogenins and mammalian ApoB-100, a core LDL particle constituent; by homology, VIT-5 is predicted to function as a lipid transport protein; loss of vit-5 activity via large-scale RNA-mediated interference (RNAi) screens indicates that VIT-5 is required for embryogenesis and normal rates of postembryonic gro…	Lipid transport protein, N-terminal	Lipoprotein amino terminal region	Vitellinogen, beta-sheet N-terminal	Vitellinogen, open beta-sheet, subdomain 2	Vitellinogen, superhelical	von Willebrand factor, type D
WBGene00006938	wee-1.1	F35H8.7	MY15/MY18/N2_UP		Protein kinase domain	Protein kinase, core	Serine/threonine protein kinase	Serine/threonine protein kinase, active site	Serine/threonine protein kinase-related	Tyrosine protein kinase
WBGene00007097	B0024.4	B0024.4	MY15/MY18/N2_UP		Protein of unknown function (DUF274)	Protein of unknown function DUF274
WBGene00007287	gck-4	C04A11.3	MY15/MY18/N2_UP		Protein kinase domain	Protein kinase, core	Serine/threonine protein kinase	Serine/threonine protein kinase, active site	Serine/threonine protein kinase-related	Tyrosine protein kinase
WBGene00007331	C05C10.4	C05C10.4	MY15/MY18_DOWN		Histidine acid phosphatase
WBGene00007338	C05C12.6	C05C12.6	MY15/MY18/N2_UP
WBGene00007703	gbf-1	C24H11.7	MY15/MY18_DOWN		Sec7 domain	SEC7-like
WBGene00008199	C49C3.9	C49C3.9	MY15/MY18/N2_UP
WBGene00008393	D1086.6	D1086.6	MY15/MY18_DOWN
WBGene00008448	E01G4.6	E01G4.6	MY15/MY18_DOWN
WBGene00008486	ugt-44	F01D4.2	MY15/MY18/N2_UP		UDP-glucoronosyl and UDP-glucosyl transferase	UDP-glucuronosyl/UDP-glucosyltransferase
WBGene00008607	F09B12.3	F09B12.3	MY15/MY18/N2_DOWN		Phospholipase B	Phospholipase B-like
WBGene00008816	F14F8.8	F14F8.8	MY15/MY18/N2_UP
WBGene00009215	thn-2	F28D1.5	MY15/MY18_DOWN		Thaumatin family	Thaumatin, pathogenesis-related
WBGene00009237	F28H7.3	F28H7.3	MY15/MY18_DOWN
WBGene00009427	fbxa-181	F35E12.3	MY15/MY18/N2_DOWN	This gene encodes a protein containing an F-box, a motif predicted to mediate protein-protein interactions either with homologs of yeast Skp-1p or with other proteins; this gene's encoded protein also contains an FTH/DUF38 motif, which may also mediate protein-protein interaction.	Cyclin-like F-box
WBGene00009587	F40F11.2	F40F11.2	MY15/MY18_DOWN
WBGene00009773	F46B6.8	F46B6.8	MY15/MY18_DOWN		ab-hydrolase associated lipase region
WBGene00009907	F49H6.3	F49H6.3	MY15/MY18_UP		Protein of unknown function (DUF1164)	Protein of unknown function DUF1164
WBGene00009982	F53F1.4	F53F1.4	MY15/MY18_DOWN
WBGene00010049	F54D5.3	F54D5.3	MY15/MY18_DOWN
WBGene00010052	F54D5.7	F54D5.7	MY15/MY18/N2_DOWN	The F54D5.7 gene encodes an ortholog of the human gene GLUTARYL-COENZYME A DEHYDROGENASE (GCDH), which when mutated leads to glutaricaciduria type I (OMIM:231670).	Acyl-CoA dehydrogenase/oxidase, central region	Acyl-CoA dehydrogenase/oxidase, N-terminal	Acyl-CoA oxidase/dehydrogenase, type1/2, C-terminal
WBGene00010107	F55C9.11	F55C9.11	MY15/MY18/N2_DOWN	This gene encodes a protein containing an F-box, a motif predicted to mediate protein-protein interactions either with homologs of yeast Skp-1p or with other proteins.	Cyclin-like F-box
WBGene00010204	F57F5.1	F57F5.1	MY15/MY18/N2_DOWN		Papain family cysteine protease	Peptidase C1A, papain	Peptidase C1A, papain C-terminal	Peptidase, cysteine peptidase active site
WBGene00010242	F58D5.2	F58D5.2	MY15/MY18_DOWN
WBGene00010351	cbd-1	H02I12.1	MY15/MY18_DOWN	cbd-1 encodes a large (1319-residue) protein with 12 chitin-binding peritrophin-A domains; cbd-1(RNAi) animals have an osmotically-sensitive embryonic lethal phenotype, perhaps because of defects in chitin and eggshell synthesis; like CEJ-1 and CPG-2, CBD-1 may participate in eggshell synthesis and early embryonic development; CBD-1's multiple peritrophin-A domains might enable mechanical cross-l…	Chitin binding protein, peritrophin-A
WBGene00010468	K01D12.9	K01D12.9	MY15/MY18_DOWN
WBGene00010939	M163.7	M163.7	MY15/MY18/N2_UP
WBGene00011038	R05H5.3	R05H5.3	MY15/MY18_DOWN		AhpC/TSA family	Alkyl hydroperoxide reductase/ Thiol specific antioxidant/ Mal allergen	Thioredoxin fold
WBGene00011276	R53.7	R53.7	MY15/MY18_UP		CBS domain pair	Cystathionine beta-synthase, core
WBGene00011308	R186.7	R186.7	MY15/MY18/N2_DOWN
WBGene00011330	T01D3.6	T01D3.6	MY15/MY18/N2_UP		EGF	EGF-like calcium-binding	EGF-like, type 3	EGF-type aspartate/asparagine hydroxylation conserved site	Fibrinogen, alpha/beta/gamma chain, C-terminal globular	Fibrinogen, alpha/beta/gamma chain, C-terminal globular, subdomain 1	von Willebrand factor, type D
WBGene00011350	T01H3.4	T01H3.4	MY15/MY18/N2_UP	T01H3.4 encodes an unfamiliar protein; T01H3.4 and T01H3.5 share an operon divergently transcribed from another operon containing vha-4.	NAD(P)-binding
WBGene00011979	T24B8.5	T24B8.5	MY15/MY18/N2_UP		Metridin-like ShK toxin	ShK domain-like
WBGene00012465	Y17G7B.12	Y17G7B.12	MY15/MY18_DOWN		Exonuclease
WBGene00012583	clec-4	Y38E10A.5	MY15/MY18/N2_UP		C-type lectin	C-type lectin-like	CUB
WBGene00012664	Y39B6A.1	Y39B6A.1	MY15/MY18/N2_DOWN		HMW kininogen
WBGene00012720	Y39E4B.11	Y39E4B.11	MY15/MY18/N2_DOWN
WBGene00012790	Y43D4A.4	Y43D4A.4	MY15/MY18/N2_DOWN		Major facilitator superfamily
WBGene00012864	Y45F3A.9	Y45F3A.9	MY15/MY18/N2_DOWN
WBGene00013220	ctl-3	Y54G11A.13	MY15/MY18/N2_DOWN	ctl-3 encodes one of three C. elegans catalases; CTL-3 is predicted to function as an antioxidant enzyme that protects cells from reactive oxygen species; a ctl-3 promoter gfp fusion construct is expressed in pharyngeal muscles and neuronal cell bodies; loss of ctl-3 activity via RNAi results in no obvious abnormalities.	Catalase	Catalase, N-terminal
WBGene00013273	Y57A10B.1	Y57A10B.1	MY15/MY18_UP		Zinc finger, RING/FYVE/PHD-type	Zinc finger, RING-CH-type
WBGene00013574	Y76A2B.2	Y76A2B.2	MY15/MY18_UP
WBGene00013658	Y105C5B.19	Y105C5B.19	MY15/MY18_DOWN		Major sperm protein	MSP (Major sperm protein) domain	PapD-like
WBGene00013709	csnk-1	Y106G6E.6	MY15/MY18_UP		Protein kinase, core	Serine/threonine protein kinase	Serine/threonine protein kinase, active site	Tyrosine protein kinase
WBGene00013816	Y116F11A.1	Y116F11A.1	MY15/MY18/N2_DOWN		AAA+ ATPase, core
WBGene00013966	ztf-9	ZK287.6	MY15/MY18_DOWN
WBGene00014017	ZK632.10	ZK632.10	MY15/MY18_DOWN		Protein of unknown function UPF0057	Uncharacterized protein family UPF0057
WBGene00014042	ZK666.2	ZK666.2	MY15/MY18_DOWN
WBGene00014135	ZK896.4	ZK896.4	MY15/MY18/N2_UP		CUB-like domain	CUB-like region
WBGene00014136	ZK896.5	ZK896.5	MY15/MY18/N2_UP		CUB-like domain	CUB-like region
WBGene00014148	ZK909.3	ZK909.3	MY15/MY18_DOWN		HD domain	Metal-dependent phosphohydrolase, HD region	Metal-dependent phosphohydrolase, HD region, subdomain
WBGene00014239	ZK1225.5	ZK1225.5	MY15/MY18_DOWN
WBGene00015152	B0348.2	B0348.2	MY15/MY18_UP		LITAF-like zinc finger domain	LPS-induced tumor necrosis factor alpha factor
WBGene00015339	C02E7.6	C02E7.6	MY15/MY18_DOWN
WBGene00015340	C02E7.7	C02E7.7	MY15/MY18_DOWN
WBGene00015502	C06A5.4	C06A5.4	MY15/MY18_DOWN		Alcohol dehydrogenase transcription factor Myb/SANT-like	MADF
WBGene00015894	acdh-2	C17C3.12	MY15/MY18/N2_DOWN	acdh-2 encodes a short-chain acyl-CoA dehydrogenase; ACDH-2 is predicted to be a mitochondrial enzyme that catalyzes the first step of fatty acid beta-oxidation and thus plays a key role in energy production; steady-state acdh-2 mRNA levels are under the control of the MDT-15 mediator complex subunit; in addition, gene expression studies indicate that acdh-2 expression is downregulated in fasted …	Acyl-CoA dehydrogenase, C-terminal domain	Acyl-CoA dehydrogenase/oxidase, central region	Acyl-CoA dehydrogenase/oxidase, N-terminal	Acyl-CoA oxidase/dehydrogenase, type 1	Acyl-CoA oxidase/dehydrogenase, type1/2, C-terminal
WBGene00015932	C17H12.6	C17H12.6	MY15/MY18/N2_UP		CUB-like domain	CUB-like region
WBGene00015933	C17H12.8	C17H12.8	MY15/MY18/N2_UP		CUB-like domain	CUB-like region
WBGene00016082	C25A8.1	C25A8.1	MY15/MY18_DOWN
WBGene00016198	C28H8.7	C28H8.7	MY15/MY18/N2_DOWN
WBGene00016447	C35D10.11	C35D10.11	MY15/MY18_DOWN		Major sperm protein	MSP (Major sperm protein) domain	PapD-like
WBGene00016670	ilys-3	C45G7.3	MY15/MY18_DOWN		Destabilase
WBGene00016887	C52E2.8	C52E2.8	MY15/MY18/N2_DOWN
WBGene00016905	ztf-3	C53D5.4	MY15/MY18_DOWN		Zinc finger, C2H2 type	Zinc finger, C2H2-like	Zinc finger, C2H2-type	Zinc finger, C2H2-type/integrase, DNA-binding
WBGene00016943	acdh-1	C55B7.4	MY15/MY18/N2_DOWN	acdh-1 encodes a short-chain acyl-CoA dehydrogenase; ACDH-1 is predicted to be a mitochondrial enzyme that catalyzes the first step of fatty acid beta-oxidation and thus plays a key role in energy production; steady-state acdh-1 mRNA levels are under the control of the MDT-15 mediator complex subunit; in addition, gene expression studies indicate that acdh-1 expression is upregulated in daf-2 mut…	Acyl-CoA dehydrogenase/oxidase, central region	Acyl-CoA dehydrogenase/oxidase, N-terminal	Acyl-CoA oxidase/dehydrogenase, type1/2, C-terminal
WBGene00017071	D2096.3	D2096.3	MY15/MY18_DOWN		Glycoside hydrolase, family 31	P-type trefoil	Trefoil (P-type) domain
WBGene00017143	EEED8.15	EEED8.15	MY15/MY18/N2_UP
WBGene00017319	F09G8.3	F09G8.3	MY15/MY18/N2_DOWN		Ribosomal protein S5 domain 2-type fold	Ribosomal protein S9	Ribosomal protein S9/S16
WBGene00017340	F10D7.3	F10D7.3	MY15/MY18_DOWN		Glutaredoxin subgroup	Glutaredoxin, eukaryotic and viruses	Thioredoxin fold
WBGene00017383	F11D5.6	F11D5.6	MY15/MY18_DOWN
WBGene00017490	F15E11.1	F15E11.1	MY15/MY18/N2_DOWN	F15E11.1, along with F15E11.14, encodes a 17.4 kDa protein (CE16999) with unknown function that is seven-fold more abundant in glp-1 mutant hermaphrodites (which lack a germline) than in normal hermaphrodites; in addition, the protein products of F15E11.1/F15E11.14 are more abundant in daf-2 mutant vs. wild-type adults during a temperature shift from 15 to 25 degrees C; F15E11.1(RNAi) animals hav…
WBGene00017500	F15E11.14	F15E11.14	MY15/MY18/N2_DOWN	F15E11.14, along with F15E11.1, encodes a 17.4 kDa protein (CE16999) with unknown function that is seven-fold more abundant in glp-1 mutant hermaphrodites (which lack a germline) than in normal hermaphrodites; in addition, the protein products of F15E11.1/F15E11.14 are more abundant in daf-2 mutant vs. wild-type adults during a temperature shift from 15 to 25 degrees C; F15E11.14 (RNAi) animals h…
WBGene00017572	F18E9.6	F18E9.6	MY15/MY18_DOWN		GLTT repeat (6 copies)	Repeat of unknown function XGLTT
WBGene00017621	F20A1.10	F20A1.10	MY15/MY18_DOWN
WBGene00017691	ilys-5	F22A3.6	MY15/MY18/N2_DOWN		Destabilase
WBGene00017727	F22H10.3	F22H10.3	MY15/MY18/N2_UP
WBGene00017757	bra-2	F23H11.1	MY15/MY18_DOWN	The bra-2 gene encodes a homolog of the human BMP receptor-associated molecule (BRAM1), paralogous to bra-1, that may act upon the SMA-6 TGF-beta signalling pathway	MYND finger	Zinc finger, MYND-type
WBGene00017771	F25B4.8	F25B4.8	MY15/MY18_DOWN		Glutathione-dependent formaldehyde-activating enzyme	Glutathione-dependent formaldehyde-activating, GFA
WBGene00017936	F30B5.7	F30B5.7	MY15/MY18_UP		Zinc/iron permease	ZIP Zinc transporter
WBGene00018252	F40H3.6	F40H3.6	MY15/MY18_UP
WBGene00018297	F41F3.3	F41F3.3	MY15/MY18_DOWN
WBGene00018310	F41G4.7	F41G4.7	MY15/MY18/N2_DOWN
WBGene00018403	F44A2.3	F44A2.3	MY15/MY18_UP		Lipid-binding serum glycoprotein, C-terminal	Lipid-binding serum glycoprotein, N-terminal
WBGene00018724	F53A9.1	F53A9.1	MY15/MY18/N2_UP
WBGene00018725	F53A9.2	F53A9.2	MY15/MY18/N2_UP
WBGene00018729	F53A9.6	F53A9.6	MY15/MY18_UP
WBGene00018732	F53A9.9	F53A9.9	MY15/MY18/N2_DOWN
WBGene00018828	sdz-21	F54E7.5	MY15/MY18_UP
WBGene00018902	F55G1.6	F55G1.6	MY15/MY18_DOWN
WBGene00019026	F58A6.9	F58A6.9	MY15/MY18_DOWN		Major sperm protein	PapD-like
WBGene00019036	F58E1.4	F58E1.4	MY15/MY18_DOWN		EGF receptor, L domain	Receptor L domain
WBGene00019188	H11E01.3	H11E01.3	MY15/MY18_UP
WBGene00019219	H20J04.4	H20J04.4	MY15/MY18_UP	H20J04.4 encodes a DEAD-box helicase; loss of H20J04.4 activity via RNAi indicates that H20J04.4 activity is required for positive regulation of growth rate, reproduction, and vulval morphogenesis.	DEAD/DEAH box helicase	DEAD-like helicase, N-terminal	DNA/RNA helicase, C-terminal	DNA/RNA helicase, DEAD/DEAH box type, N-terminal	Helicase, superfamily 1 and 2, ATP-binding	RNA helicase, DEAD-box type, Q motif
WBGene00019236	H23N18.5	H23N18.5	MY15/MY18_DOWN		Phospholipase A2, active site
WBGene00019518	K08B5.1	K08B5.1	MY15/MY18/N2_DOWN		Serpentine type 7TM GPCR receptor class ab chemoreceptor
WBGene00019660	K11H12.4	K11H12.4	MY15/MY18/N2_UP		Protein of unknown function (DUF274)	Protein of unknown function DUF274
WBGene00019682	K12H4.7	K12H4.7	MY15/MY18_DOWN		Peptidase S28	Serine carboxypeptidase S28
WBGene00019738	clec-265	M02F4.7	MY15/MY18/N2_UP		C-type lectin	C-type lectin-like	Lectin C-type domain
WBGene00019746	M03A1.3	M03A1.3	MY15/MY18_DOWN	M03A1.3 encodes a protein with ~10 predicted transmembrane sequences; it has an internal repeat (in residues 74-351 and 377-668), with some similarity in these repeated domains to worm C05D12.1 and C13B4.1, and to mammalian stromal cell derived factor receptor 2.	Cytochrome b561/ferric reductase transmembrane
WBGene00019801	aak-1	PAR2.3	MY15/MY18/N2_UP	aak-1 encodes one of two C. elegans homologs of the catalytic alpha subunit of AMP-activated protein kinases (AMPKs); aak-1 activity is required, in parallel with aak-2 and downstream of daf-2, daf-7, and par-4, for negative regulation of germline proliferation during dauer development.	Cytochrome P450	Protein kinase domain	Protein kinase, core	Serine/threonine protein kinase	Serine/threonine protein kinase, active site	Serine/threonine protein kinase-related	Tyrosine protein kinase
WBGene00019909	R06A10.1	R06A10.1	MY15/MY18/N2_DOWN
WBGene00020040	R12E2.15	R12E2.15	MY15/MY18_DOWN
WBGene00020166	T02G5.7	T02G5.7	MY15/MY18_DOWN	The T02G5.7 gene encodes a homolog of the human gene ACAT1, which when mutated leads to alpha-methylacetoaceticaciduria (OMIM:203750).	Thiolase	Thiolase, N-terminal domain	Thiolase-like, subgroup
WBGene00020579	T19D12.4	T19D12.4	MY15/MY18/N2_UP		von Willebrand factor, type A
WBGene00020753	T24A6.16	T24A6.16	MY15/MY18_DOWN		Protein of unknown function DUF595	Protein of unknown function, DUF595
WBGene00020760	T24C4.4	T24C4.4	MY15/MY18_UP		Protein of unknown function (DUF1164)	Protein of unknown function DUF1164
WBGene00020860	nspd-10	T27C10.7	MY15/MY18_DOWN		Caenorhabditis elegans protein of unknown function (DUF780)	Protein of unknown function DUF780, Caenorhabditis species
WBGene00020926	W02B3.6	W02B3.6	MY15/MY18/N2_DOWN		GLTT repeat (6 copies)
WBGene00020930	hlh-30	W02C12.3	MY15/MY18/N2_UP	W02C12.3 is orthologous to the human gene TRANSCRIPTION FACTOR BINDING TO IGHM ENHANCER 3 (TFE3; OMIM:314310), which when mutated leads to disease	Basic helix-loop-helix dimerisation region bHLH	Helix-loop-helix DNA-binding	Helix-loop-helix DNA-binding domain
WBGene00020982	W03D2.7	W03D2.7	MY15/MY18_DOWN
WBGene00021006	dct-9	W03F11.3	MY15/MY18_DOWN		Major sperm protein	PapD-like
WBGene00021625	Y47D7A.13	Y47D7A.13	MY15/MY18_DOWN
WBGene00021627	Y47D7A.15	Y47D7A.15	MY15/MY18_DOWN
WBGene00021879	clec-83	Y54G2A.14	MY15/MY18/N2_UP		C-type lectin	C-type lectin-like	Lectin C-type domain
WBGene00022040	Y65B4BR.1	Y65B4BR.1	MY15/MY18_DOWN		GDSL-like Lipase/Acylhydrolase	Lipase, GDSL
WBGene00022049	Y66H1B.3	Y66H1B.3	MY15/MY18/N2_UP		Calponin homology (CH) domain	Calponin-homology	Calponin-like actin-binding	Filamin/ABP280 repeat	Filamin/ABP280 repeat-like	Immunoglobulin-like fold
WBGene00022374	nhr-277	Y94H6A.1	MY15/MY18_UP		Nuclear hormone receptor, ligand-binding	Nuclear hormone receptor, ligand-binding, core	Zinc finger, NHR/GATA-type	Zinc finger, nuclear hormone receptor-type
WBGene00022605	ZC404.11	ZC404.11	MY15/MY18/N2_DOWN		GPCR, rhodopsin-like	GPCR, rhodopsin-like superfamily	Serpentine type 7TM GPCR chemoreceptor Srw
WBGene00022642	ZK6.7	ZK6.7	MY15/MY18_DOWN		ab-hydrolase associated lipase region
WBGene00022645	ZK6.11	ZK6.11	MY15/MY18/N2_UP		Protein of unknown function (DUF274)	Protein of unknown function DUF274
WBGene00022698	ZK353.2	ZK353.2	MY15/MY18_UP
WBGene00022813	ZK742.3	ZK742.3	MY15/MY18_DOWN		Aldolase-type TIM barrel	NADH:flavin oxidoreductase / NADH oxidase family	NADH:flavin oxidoreductase/NADH oxidase, N-terminal
